# Supplementary material for: Targeting SIRT1 Rescues Age- and Obesity-Induced Microvascular Dysfunction in Ex Vivo Human Vessels
Source: PubMed Central journal article supplement — Circ Res. 2022 Aug 15;131(6):476–91. doi: 10.1161/CIRCRESAHA.122.320888 (PMC9426744; doi:10.1161/circresaha.122.320888), 2022-08-15
Supplement: res-131-476-s001.pdf [file res-131-476-s001.pdf]

## 1 SUPPLEMENTAL MATERIAL

2

### 3 DETAILED METHODS

4

#### 5 Exclusion criteria and study design

6 We aimed to recruit a population of obese subjects at the very early stage of the disease to  
7 dissect the independent role of obesity in endothelial function and to investigate metabolic  
8 microvascular dysfunction in its very early stage. The exclusion criteria were: age <18/> 80  
9 years, history or clinical evidence of hypertension, clinical or biochemical evidence of diabetes  
10 or endocrine dysfunction, ethanol consumption >60 g per day, dyslipidemia, smoking habits,  
11 renal or liver impairment, menopausal status, and any documented CV disease. Patients  
12 assuming any chronic pharmacologic therapy were also excluded, as well as those taking non-  
13 steroidal anti-inflammatory drugs within the last 48 hours from surgery. Control subjects' body  
14 mass index (BMI) had to be below 30 Kg/m<sup>2</sup>. No blinding procedures were adopted in the  
15 study design. Given the large number of hypothesis-driven experiments reported in the study  
16 and their novelty that makes preliminary data unavailable, no formal sample size calculation  
17 was performed for each assay. However, the number of subjects/samples included in each assay  
18 was defined based on our laboratory experience and previous studies. As some experiments  
19 required a substantial amount of material, for each experiment, the experimental groups' size  
20 was decided based on sample availability and quality and the experiment's feasibility. The  
21 obtained groups' sizes aligned with previous studies [8, 81-87]. In the case of exploratory or  
22 confirmatory experiments, we decided to analyze smaller groups. In particular, we adopted a  
23 small sample size (n=5 or n=6) for experiments exploring opposite phenotypes (*e.g.* Young  
24 Nonobese vs Old Obese) and a minimal sample size (n=3) for confirmatory experiments (see,  
25 *e.g.* **Supplementary Figure 1** and **Supplementary Figure 4**).

## 26 **Clinical history and visit**

27 We obtained complete medical history via interview or from the patient clinical records  
28 (including smoking history and current or previous use of medications). Blood pressure and  
29 heart rate were measured with an oscillometric device three times, with the participant in a  
30 seated position, after 5 minutes of rest in a quiet room. The average of the three readings was  
31 used for the analyses. Height and weight were measured with the participant wearing light clothes  
32 and without shoes. The BMI was calculated as weight (kg) divided by squared height (m<sup>2</sup>).  
33 HOMA-IR was calculated as [fasting glucose (mmol/l) x fasting insulin (pmol/l)]/135.

34

## 35 **Biochemistry**

36 Fasting blood samples were collected from each patient before the surgical procedure. Plasma  
37 glucose, insulin, total serum cholesterol, triglycerides and HDL-cholesterol levels were  
38 assessed by photometric analysis (Roche Modular Series, Indianapolis, IN, USA) according to  
39 standard procedures (<https://wwwn.cdc.gov/nchs/data/nhanes/2019-2020/manuals/2020->  
40 [MEC-Laboratory-Procedures-Manual-508.pdf](https://wwwn.cdc.gov/nchs/data/nhanes/2019-2020/manuals/2020-MEC-Laboratory-Procedures-Manual-508.pdf)); LDL-cholesterol levels were calculated  
41 according to the Friedewald formula [88].

42

## 43 **Preparation of small arteries, structural and functional parameters**

44 Biopsies of subcutaneous adipose tissue were recovered during the surgical procedures and  
45 processed to isolate small resistance arteries (150-300 µm lumen diameter) as previously  
46 described [81]. After isolation, arteries were mounted in a pressurised myograph (DMT 114P,  
47 Danish Myo Technology A/S, Hinnerup-Denmark) to assess their structural and functional  
48 characteristics. Vessels were then rested in a Krebs [89] solution at 37°C and perfused ad +60

49 mmHg. KCl (125 mM) + norepinephrine (1  $\mu$ M, Sigma Aldrich SRL, Milano-Italy) were added  
50 to the solution to assess vessel viability and vitality. The obtained maximal contractility  
51 response was used to measure the minimum vessel diameter ( $D_m$ ). KCl solution was then  
52 washed out with Krebs solution, and vessels were left quiescent for at least 45 minutes before  
53 starting the functional experiments.

54 Endothelium-dependent and -independent relaxations were assessed by cumulative  
55 concentrations of acetylcholine (ACh, 0.001-100  $\mu$ M, Sigma Aldrich SRL, Milano-Italy) and  
56 sodium nitroprusside (0.01-100  $\mu$ M, Sigma Aldrich SRL, Milano-Italy) in vessels  
57 precontracted with norepinephrine (1  $\mu$ M, Sigma Aldrich SRL, Milano-Italy). Vasodilation  
58 response was described as % changes to the maximal vessel diameter ( $D_M$ ).  $D_m$  was subtracted  
59 to both terms of the equation:

$$60 \quad (d-D_m)/(D_M-D_m)*100,$$

61 where d is the diameter measured when exposed to a specific ACh concentration.

62 NO availability and the contributions of SIRT1, mtROS and NADPH oxidase to the endothelial  
63 dysfunction were investigated by repeating the dose-response curves to acetylcholine after  
64 incubation with the NO synthase inhibitor L-NAME (100  $\mu$ M, 30 min-incubation, Sigma  
65 Aldrich SRL, Milano-Italy), the SIRT1 agonist SRT1720 (1  $\mu$ M, 4-hour incubation; Sigma  
66 Aldrich SRL, Milano-Italy), the SIRT1 siRNA sc-40986 (overnight transfection, Santa Cruz  
67 Biotechnology, Inc., Dallas-Texas USA), the mitochondrial ROS scavenger MitoTEMPO (1  
68  $\mu$ M, 30 min-incubation, Sigma Aldrich SRL, Milano-Italy), the whole-cell ROS scavenger  
69 tempol (1  $\mu$ M, 30 min-incubation, Sigma Aldrich SRL, Milano-Italy), the electron transport  
70 chain complex I inhibitor rotenone [27] (1  $\mu$ M, 1-hour incubation, Sigma Aldrich SRL, Milano-  
71 Italy) and the NADPH oxidase inhibitor gp91ds-tat (1  $\mu$ M; DBA, Milano-Italy). Concentration  
72 and timing were based on our previous protocols and preliminary data [8, 81, 90]. SIRT1

73 silencing through sc-40986 was performed by overnight transfecting human small vessels  
74 through Lipofectamine RNAiMAX according to the manufacturer's instructions (13778075,  
75 Invitrogen, Waltham, MA 02451, USA).

76 To confirm that a possible recovery of endothelial function after the addition of SRT1720 was  
77 due to improved function of the eNOS, SRT1720 and L-NAME were incubated  
78 simultaneously. In turn, to verify that the selective inhibition of SIRT1 impairs endothelial  
79 function through eNOS, L-NAME was incubated after sc-40986 transfection. L-NAME  
80 maximal vasoconstrictor response was calculated as the difference between the maximal  
81 vasodilation to ACh and the maximal vasodilation to L-NAME. L-NAME maximal  
82 vasoconstrictor response improvement after incubation with SRT1720 was calculated as the  
83 difference between L-NAME maximal vasoconstrictor response after and before the incubation  
84 with SRT1720.

85 Similarly, to explore the potential additive effect between restored SIRT1 activity and reduced  
86 mtROS production or inhibition of the NADPH oxidase, acetylcholine was repeated after  
87 incubation of the vessel with both SRT1720 and MitoTEMPO or SRT1720 and gp91ds-tat.

88 To eliminate the contribution of the myogenic tone, structural parameters were assessed after  
89 placing the vessels in a physiological salt solution without CaCl<sub>2</sub> plus 10 mmol/L EGTA [89].  
90 Media thickness and lumen diameter were measured in 3 different points from each small artery  
91 to obtain the media-lumen ratio (M/L). Media cross-sectional area (MCSA) was obtained by  
92 subtracting the internal from the external cross-sectional areas using outer plus lumen  
93 diameters, as previously described [91].

94

95 **qPCR assay for SIRT1 and mitochondria proteins involved in the mtROS production**

96 Total RNA was extracted using TRIzol Reagent (Invitrogen, Carlsbad, CA) according to the  
97 manufacturer's recommendations. Before extraction, vascular samples were lysed by using a  
98 Precellys homogenizer. Conversion of total cellular RNA to cDNA was carried out with  
99 Moloney murine leukaemia virus reverse transcriptase and random hexamers (Amersham  
100 Bioscience, Piscataway, USA) in a final volume of 33  $\mu$ l, using 1  $\mu$ g of cDNA. Real-time PCR  
101 was performed using the SYBR Select Master Mix (Applied Biosystems, Thermo Fischer  
102 Scientific, Zug, Switzerland) on a Quant Studio 5 and 7 cyclers (Life Technologies, Thermo  
103 Fischer Scientific, Zug, Switzerland) according to the manufacturer's instructions. Primers are  
104 available in the Major resources table. TBP was used as an endogenous control for normalizing  
105 RNA concentration. The amplification program consisted of 1 cycle at 95 °C for 10 min,  
106 followed by 40 cycles with a denaturing phase at 95°C for 30 s and an annealing and elongation  
107 phase of 1 min at 60°C. A melting curve analysis was performed after amplification to verify  
108 the accuracy of the amplicon. Differences in Ct values between test genes and endogenous  
109 controls (TBP,  $\Delta$ Ct) were calculated and used for statistical analysis.

110

### 111 **Vascular mtROS and NO production assays**

112 The *in situ* production of mtROS and NO was measured using the fluorescent dyes MitoSOX  
113 Red (ThermoFischer Scientific, Milano, Italy) and 4-Amino-5-Methylamino-2',7'-  
114 Difluorofluorescein (DAF-FM; Sigma Aldrich SRL, Milano, Italy), respectively. Isolated  
115 segment vessels from each patient were cut into 30- $\mu$ m-thick sections and placed on a glass  
116 slide. Three slides per segment were analyzed simultaneously after incubation with Krebs  
117 solution at 37°C for 30 min. Krebs-HEPES buffer containing 2  $\mu$ M MitoSOX Red or 5  $\mu$ M  
118 DAF-FM was then applied to each section and evaluated under fluorescence microscopy. The  
119 percentage of arterial wall area stained with the red signal was evaluated using imaging  
120 software (McBiophotonics Image J, version 1.53; National Institutes of Health, Bethesda, MD).

121 To assess the impact of a restored SIRT1 activity on the vascular mtROS and NO production  
122 in vessels obtained from Old Obese patients, the MitoSOX Red staining and the DAF-FM  
123 staining were repeated after pre-incubation with the SRT1720. To assess the NO impairment  
124 and mtROS production induced by selective inhibition of SIRT1, the colourations were  
125 repeated on small resistance arteries obtained from the Young Nonobese group after an  
126 overnight transfection with sc-40986. The staining was also performed on vessels from the  
127 same Young Nonobese at baseline and after an overnight transfection with scrambled siRNA  
128 (Santa Cruz Biotechnology, Switzerland), respectively, as control groups.

129 To provide consistency in our results, in a small sample of patients (n=3 for each group), we  
130 adopted highly-specific fluorescence probes [67-69]: ENZ-51013 ROS-ID® NO Detection kit  
131 (Enzo Life Sciences Inc, Milano, Italy; Detection Reagent diluted 1:400 as per manufacturer  
132 instruction) and 10  $\mu$ M Mito peroxy yellow-1 (MITOPY1; Bio-Techne srl, Milano, Italy).  
133 Young Nonobese vessels stimulated with L-Arginine (as NO inducer) and Old Obese vessels  
134 stimulated with high-dose (20  $\mu$ M) rotenone were used as a positive control. Old Obese vessels  
135 stimulated with c-PTIO (as NO scavenger) and Young Nonobese vessels stimulated with  
136 mitoTEMPO (as mtROS scavenger) were used as a negative control. After incubation, prepared  
137 vessels were immediately mounted on coverslips and observed under a fluorescent/confocal  
138 microscope. For each figure, representative images were chosen as a balance between the high  
139 quality of the image and the most accurate representation of the mean value for each  
140 experimental group.

141

## 142 **Western blot**

143 Specimens of small visceral arteries were homogenized in radioimmunoprecipitation assay  
144 buffer (RIPA buffer, R0278, Sigma-Aldrich, St. Louis, MO 63103, USA) supplemented with

145 protease inhibitor cocktails (P8340, Sigma-Aldrich, St. Louis, MO 63103, USA) with a  
146 polytron homogenizer and centrifuged at  $13.000\times g$  at  $4^{\circ}\text{C}$  for 20 min. The resulting  
147 supernatants were separated from pellets and stored at  $-20^{\circ}\text{C}$ . Proteins' concentration was  
148 measured using Bradford method (B6916, Sigma-Aldrich, St. Louis, MO 63103, USA).

149 An equal amount of proteins (30  $\mu\text{g}$ ) were diluted in 4x Laemmli Sample Buffer and heated at  
150  $70^{\circ}\text{C}$  for 10 min. Proteins were separated on 8% SDS-PAGE gel and then transferred to  
151 Amersham Protan Nitrocellulose 0.45  $\mu\text{m}$  (GE10600002, GE Healthcare, Marlborough, MA,  
152 USA). After blocking the membrane using BSA 5% in TTBS (TBS-Tween-20 0.1%) for 1 h at  
153 room temperature, blots were washed three times in TTBS and incubated overnight at  $4^{\circ}\text{C}$  with  
154 anti-SIRT1 diluted 1:1000 (SIRT1(H-300): sc-15404, Santa Cruz Biotechnology, Dallas, TX  
155 75220 USA) and anti- $\beta$ -Actin diluted 1:1000 (A2066 Sigma-Aldrich, St. Louis, MO 63103,  
156 USA). Following three washes with TTBS, blots were incubated with secondary antibody Anti-  
157 Rabbit IgG (whole molecule–Peroxidase antibody produced in goat; 1:80.000, A0545, Sigma-  
158 Aldrich Louis, MO 63103, USA) for 1 h at room temperature. The bands were detected by  
159 incubating the nitrocellulose membranes with Clarity MAX Western ECL Substrate for 5  
160 minutes and acquired using ChemiDoc Imaging System (Bio-Rad Laboratories).

161

## 162 **Mitochondria isolation and swelling assay**

163 Mitochondria swelling assay was performed to characterize further the protection induced by  
164 SIRT1 function on the mitochondria functional and structural integrity. Indeed, mitochondria  
165 resistance to swelling might be considered a summary measure of mitochondria health. Thus,  
166 its results are important for accurately observing how the SIRT1 pathway modulates the  
167 mitochondria homeostasis.

168 Vessels were suspended in the mitochondrial buffer containing 250 mmol/L sucrose, 10  
169 mmol/L MOPS, 5  $\mu$ mol/L EGTA, 2 mmol/L MgCl<sub>2</sub>, 5 mmol/L KH<sub>2</sub>PO<sub>4</sub>, 5 mmol/L pyruvate,  
170 5 mmol/L malate, 10  $\mu$ g/mL leupeptin, and 10  $\mu$ g/mL aprotinin, and gently homogenized with  
171 a Dounce homogenizer (30 strokes). The homogenate was centrifuged at 750 g for 10 minutes  
172 at 4°C to remove nuclei and unbroken cells, and the supernatant was centrifuged at 10,000 g  
173 for 15 minutes. The resultant mitochondrial pellet was resuspended in mitochondrial buffer.

174 Forty  $\mu$ g of isolated mitochondria in mitochondrial buffer were incubated with 150  $\mu$ mol/L of  
175 calcium chloride (CaCl<sub>2</sub>) in a final volume of 200  $\mu$ L in a 96-well plate for 20 minutes. Light  
176 scattering measured through absorbance at 520 nm was read every 30 seconds at 520 nm.  
177 Calcium stimulates the permeability of the inner mitochondrial membrane, namely by opening  
178 the mitochondrial permeability transition pore. This translates into a decreased light  
179 absorbance. In healthy mitochondria, there is no substantial difference in the light absorbance  
180 because Calcium is not able to induce a significant swelling. When the mitochondrion is  
181 damaged, a relevant difference is observed [92, 93]. Absolute values of mitochondrial swelling  
182 assay do not allow for discrimination between healthy and disease, as they are generally  
183 reported compared to a healthy group [92]. Also, their absolute value in terms of absorbance  
184 decrease depends on the solution's concentration [94].

185

### 186 **Chromatin immunoprecipitation (ChIP) assay**

187 Chromatin immunoprecipitation was performed in human vascular samples using the Magna  
188 ChIP Assay Kit (Millipore, Billerica, USA), according to the manufacturer's instructions.  
189 Briefly, human vessels were fixed for 10 minutes with 37% paraformaldehyde. After stopping  
190 cross-linking by adding 0.1 M glycine, the tissues were sonicated and centrifuged. ChIP was  
191 performed using 10  $\mu$ g of anti-SIRT1 (Millipore, Billerica, USA) and equivalent amounts of



192 mouse IgG (Millipore, Billerica, USA) as a negative control. Washes and elution of the IP  
193 DNA were performed according to the Magna ChIP protocol. Quantifications of Sirt1 binding  
194 on p66<sup>Shc</sup> promoter, ArgII promoter and Sirt3 promoter were performed by Real time PCR  
195 (primers are available in the major resource table). Quantifications were performed using the  
196 comparative cycle threshold method and are reported as the n fold difference in antibody-bound  
197 chromatin against the input DNA.

## 198 SUPPLEMENTAL FIGURES AND FIGURES LEGENDS

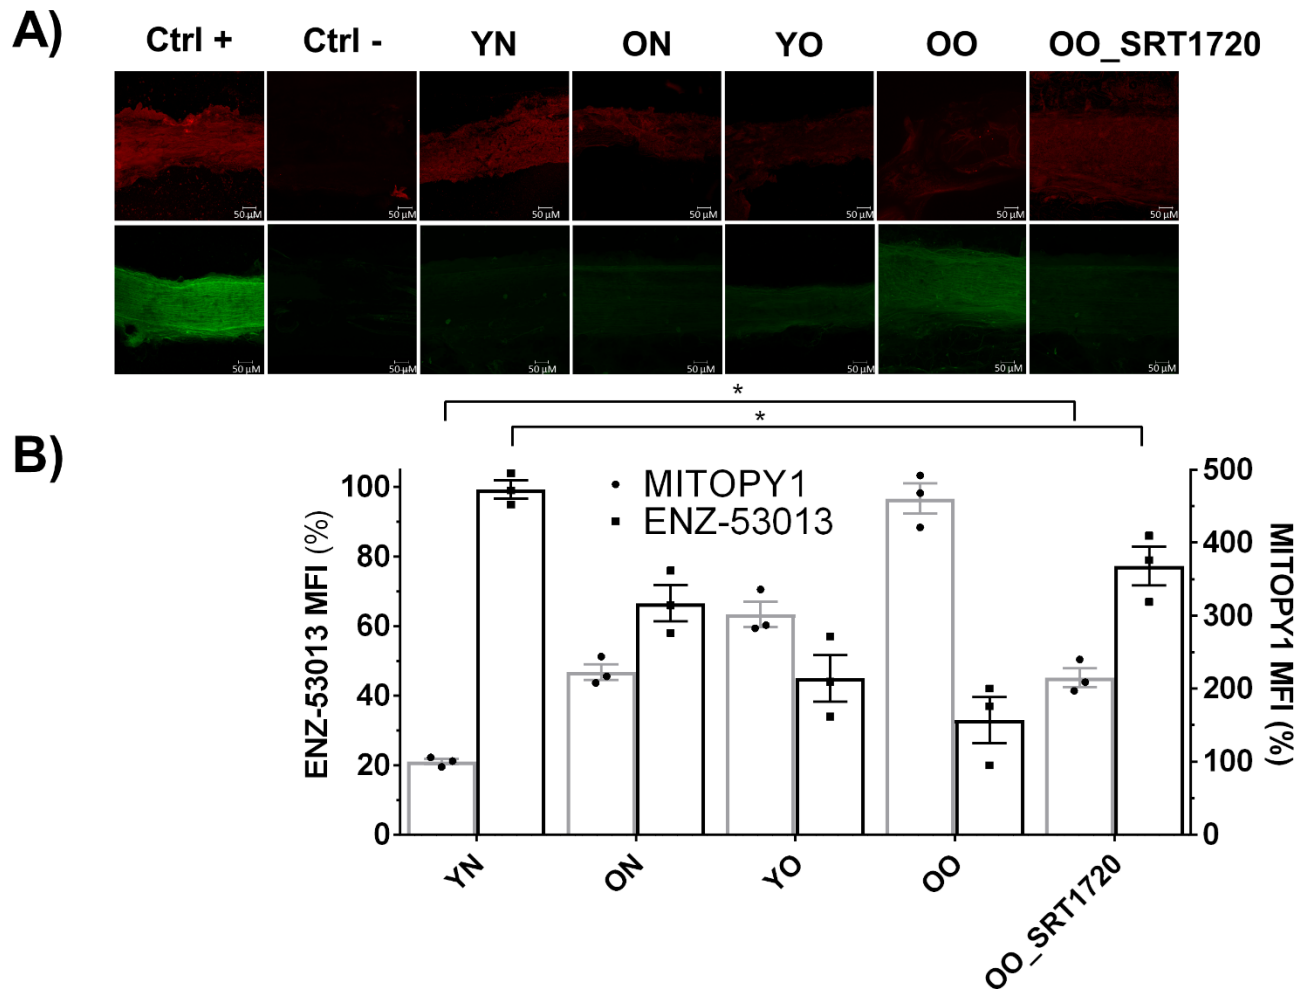

199

200 **Supplementary Figure 1. High-specific fluorescent probes assay**

201 A) Differences in NO levels (red staining) and mtROS (green staining) assessed by ENZ-53013  
 202 and MITOPY1 fluorescence in the Young Nonobese, Old Nonobese, Young Obese, Old Obese  
 203 and Old Obese after incubation with SRT1720 (n=3 for each group). Young Nonobese vessels  
 204 stimulated with L-Arginine (as NO inducer) and Old Obese vessels stimulated with high-dose  
 205 rotenone were used as a positive control. Old Obese vessels stimulated with c-PTIO (as NO  
 206 scavenger) and Young Nonobese vessels stimulated with mitoTEMPO (as mtROS scavenger)  
 207 were used as a negative control. B) Data are presented as mean±SEM and were compared by  
 208 the Kruskal-Wallis test. Fluorescence is calculated as mean fluorescence intensity (MFI) and

209 expressed as % of the Young Nonobese group. Original magnification is 20 x. *ON: Old*  
210 *Nonobese; OO: Old Obese; YN: Young Nonobese; YO: Young Obese.*

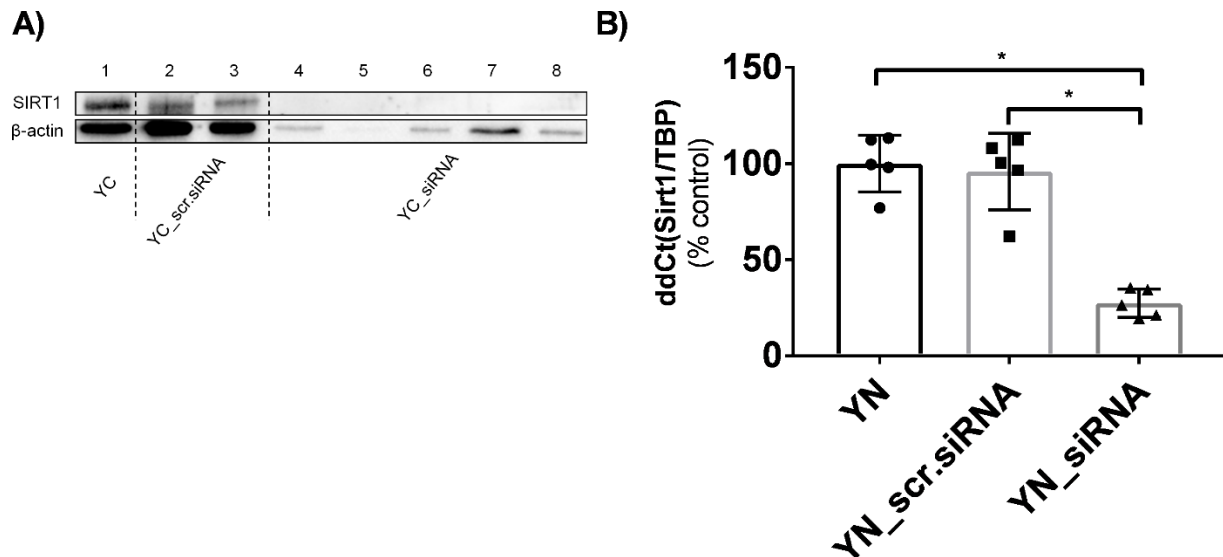

211

212 **Supplemental Figure 2. Confirmatory Western Blot and qPCR of Young Nonobese**  
 213 **vessels treated with sc-40986.**

214 **A)** Protein expressions (Young Nonobese: n=1, Young Nonobese\_scr.siRNA: n=2; Young  
 215 Nonobese\_siRNA: n=5) and **B)** qPCR expression of SIRT1 in small vessels' pools (n=5 each  
 216 group) from the same Young Nonobese subjects of the functional and fluorescence staining  
 217 experiments (**Figure 5A** and **5B-C**, respectively). Results are expressed as % to control. Data  
 218 are presented as mean $\pm$ SD and were compared by the Kruskal-Wallis test with Dwass-Steel-  
 219 Critchlow-Flinger post-hoc test. A p-value <0.05 was considered significant. \*: p<0.05.\*\*:  
 220 p<0.01. *YN: Young Nonobese.*

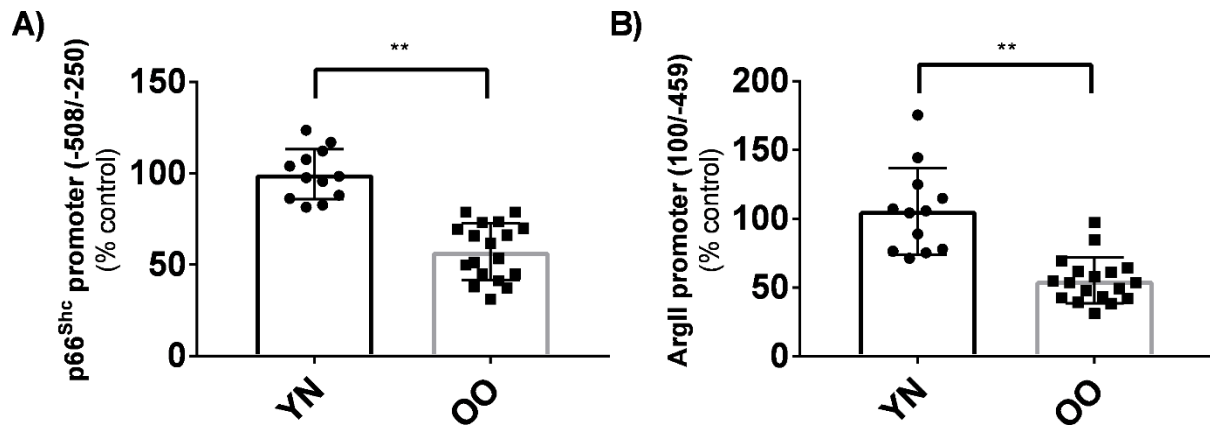

221

222 **Supplementary Figure 3. SIRT1 binding to promoter region p66<sup>Shc</sup> (A) and Arginase II**  
 223 **(B).**

224 qPCR after ChIP assay showing binding of SIRT1 on the promoter region of p66<sup>Shc</sup> (A) and  
 225 Arginase II (B) genes in Young Nonobese (n=12) and Old Obese (n=18) patients. Shapiro-  
 226 Wilk test was adopted to assess normality. Binding to the promoter of Arginase II was natural  
 227 log-transformed for the means of the analyses. Data are presented as mean±SD and were  
 228 compared by independent samples Student's t-test. A p-value <0.05 was considered significant.

229 \*: p<0.05. \*\*: p<0.01. *ArgII*: Arginase II; *OO*: Old Obese; *YN*: Young Nonobese.

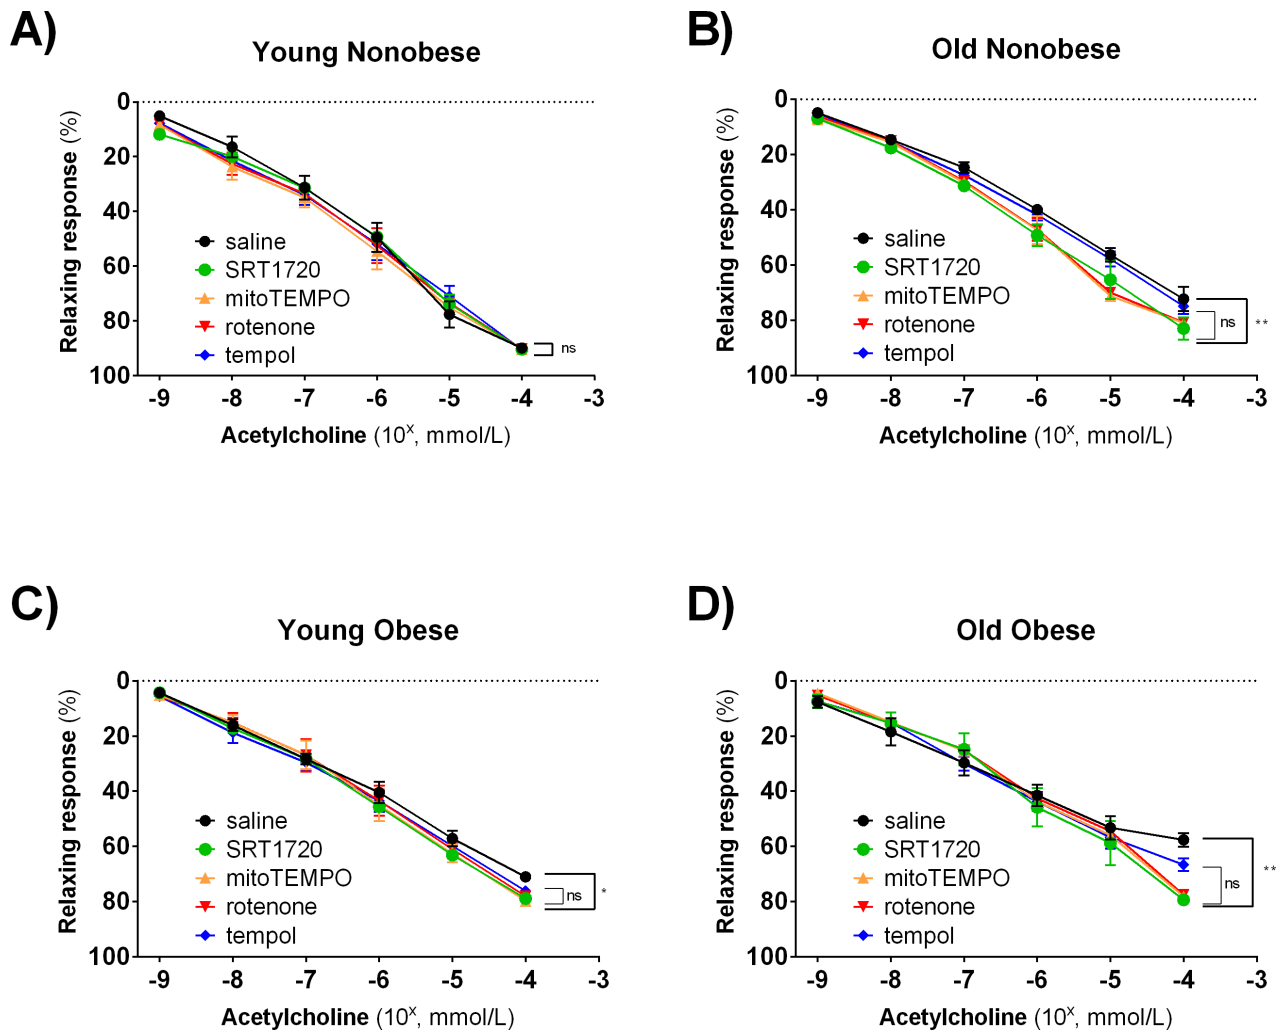

230

231 **Supplementary Figure 4. Comparison of SRT1720, mitoTEMPO, rotenone and tempol**  
 232 **rescuing microcirculatory dysfunction in the four groups.**

233 **A-D)** Relaxing response to cumulative concentration to Ach in vessels precontracted with  
 234 norepinephrine in the four groups (n=3 for each group). Vasodilatory response is expressed as  
 235 % of the maximal diameter. The experiment was repeated five times for each patient by  
 236 incubating the vessel with saline (black circle), SRT1720 (green circle), mitoTEMPO (orange  
 237 triangle), rotenone (red reverse triangle), tempol (blue rhombus). Data are presented as  
 238 mean±SD and were compared by the Friedman test followed by Durbin-Conover as a post-hoc  
 239 test. A p-value <0.05 was considered significant. \*: p<0.05. \*\*: p<0.01.

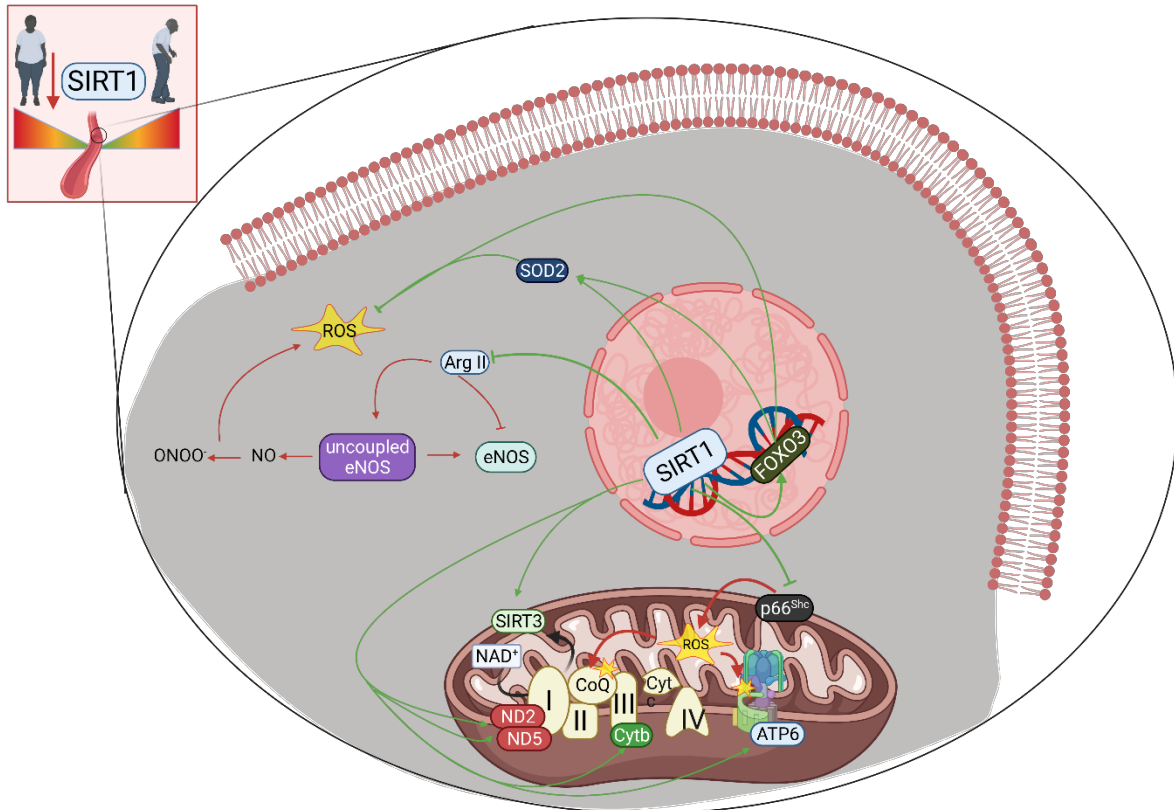

240

241 **Supplemental Figure 5. SIRT1 regulates a plethora of genes implicated in mitochondrial**  
 242 **and endothelial function.**

243 SIRT1 is a novel central modulator of obesity and ageing vascular impairment, protecting  
 244 microcirculation from endothelial dysfunction. Indeed, SIRT1 gene expression is lower during  
 245 ageing and obesity in the microvessel. Due to its pleiotropic involvement in regulating NO  
 246 availability and cellular and mitochondrial ROS production, its downregulation impairs  
 247 endothelial function mainly by damaging mitochondrial function. These activities are primarily  
 248 exerted through epigenetic mechanisms and make SIRT1 the centre of the cross-talk between  
 249 substrates availability, cellular metabolism and vascular phenotype. *ArgII*: Arginase II; *ATP*  
 250 *synthase 6*; *Cytb*: Cytochrome *b*; *FOXO3*: Forkhead box protein O3; *ND2*: NADH  
 251 *dehydrogenase 2*; *ND5*: and NADH dehydrogenase 5; *SOD-2*: superoxide dismutase-2.

252 **Supplementary Table 1 – Figures and Table statistics**

|                                                                                      |              |          | <b>p</b>        |
|--------------------------------------------------------------------------------------|--------------|----------|-----------------|
| <b>Figure 1</b>                                                                      |              |          |                 |
| <b>Figure 1A</b>                                                                     |              |          |                 |
| Age                                                                                  |              |          | $3.34*10^{-6}$  |
| BMI group                                                                            |              |          | $2.32*10^{-2}$  |
| Age*BMI group                                                                        |              |          | $9.48*10^{-3}$  |
| Nonobese group                                                                       | r=0.555      | x=0.0148 | $1.35*10^{-4}$  |
| Obese group                                                                          | r=0.487      | x=0.0533 | $5.23*10^{-4}$  |
| <i>Test: linear regression</i>                                                       |              |          |                 |
| <i>Sample size: Nonobese=42, Obese=47</i>                                            |              |          |                 |
| <b>Figure 1B</b>                                                                     |              |          |                 |
| Age                                                                                  |              |          | $3.43*10^{-31}$ |
| BMI                                                                                  |              |          | $8.82*10^{-35}$ |
| Age*BMI                                                                              |              |          | $5.25*10^{-9}$  |
| Young Nonobese                                                                       | Young Obese  |          | $4.94*10^{-27}$ |
| Young Nonobese                                                                       | Old Nonobese |          | $3.97*10^{-28}$ |
| Young Nonobese                                                                       | Old Obese    |          | $3.47*10^{-42}$ |
| Young Obese                                                                          | Old Nonobese |          | ns              |
| Young Obese                                                                          | Old Obese    |          | $5.72*10^{-13}$ |
| Old Nonobese                                                                         | Old Obese    |          | $3.88*10^{-21}$ |
| <i>Test: two-way ANOVA followed by Holm-Sidak post hoc correction</i>                |              |          |                 |
| <i>Sample size: Young Nonobese=12, Old Nonobese=31, Young Obese=15, Old Obese=32</i> |              |          |                 |
| <b>Figure 1C</b>                                                                     |              |          |                 |
| Age                                                                                  |              |          | $6.48*10^{-18}$ |
| BMI                                                                                  |              |          | $1.11*10^{-8}$  |
| Age*BMI                                                                              |              |          | $4.25*10^{-7}$  |
| Young Nonobese                                                                       | Young Obese  |          | $2.19*10^{-9}$  |
| Young Nonobese                                                                       | Old Nonobese |          | $8.49*10^{-17}$ |
| Young Nonobese                                                                       | Old Obese    |          | $3.53*10^{-18}$ |
| Young Obese                                                                          | Old Nonobese |          | $1.03*10^{-3}$  |
| Young Obese                                                                          | Old Obese    |          | $1.16*10^{-4}$  |
| Old Nonobese                                                                         | Old Obese    |          | ns              |
| <i>Test: two-way ANOVA followed by Holm-Sidak post hoc correction</i>                |              |          |                 |
| <i>Sample size: Young Nonobese=12, Old Nonobese=31, Young Obese=15, Old Obese=32</i> |              |          |                 |
| <b>Figure 1D</b>                                                                     |              |          |                 |
| Age                                                                                  |              |          | ns              |
| BMI                                                                                  |              |          | ns              |
| Age*BMI                                                                              |              |          | ns              |
| Young Nonobese                                                                       | Young Obese  |          | ns              |
| Young Nonobese                                                                       | Old Nonobese |          | ns              |
| Young Nonobese                                                                       | Old Obese    |          | ns              |
| Young Obese                                                                          | Old Nonobese |          | ns              |
| Young Obese                                                                          | Old Obese    |          | ns              |
| Old Nonobese                                                                         | Old Obese    |          | ns              |
| <i>Test: two-way ANOVA followed by Holm-Sidak post hoc correction</i>                |              |          |                 |
| <i>Sample size: Young Nonobese=12, Old Nonobese=31, Young Obese=15, Old Obese=32</i> |              |          |                 |
| <b>Figure 1E</b>                                                                     |              |          |                 |
| Age                                                                                  |              |          | $1.91*10^{-2}$  |
| BMI                                                                                  |              |          | $8.81*10^{-4}$  |
| Age*BMI                                                                              |              |          | ns              |



|                                                                                     |              |                 |
|-------------------------------------------------------------------------------------|--------------|-----------------|
| Young Nonobese                                                                      | Young Obese  | $4.47*10^{-2}$  |
| Young Nonobese                                                                      | Old Nonobese | $4.47*10^{-2}$  |
| Young Nonobese                                                                      | Old Obese    | $4.47*10^{-2}$  |
| Young Obese                                                                         | Old Nonobese | ns              |
| Young Obese                                                                         | Old Obese    | $4.47*10^{-2}$  |
| Old Nonobese                                                                        | Old Obese    | $4.47*10^{-2}$  |
| <i>Test: Scheirer-Hare-Ray test followed by Dunn post hoc correction</i>            |              |                 |
| <i>Sample size: Young Nonobese=5, Old Nonobese=5, Young Obese=5, Old Obese=5</i>    |              |                 |
| <b>Figure 1F</b>                                                                    |              |                 |
| Age                                                                                 |              | $1.31*10^{-7}$  |
| BMI                                                                                 |              | $8.73*10^{-4}$  |
| Age*BMI                                                                             |              | ns              |
| Young Nonobese                                                                      | Young Obese  | ns              |
| Young Nonobese                                                                      | Old Nonobese | ns              |
| Young Nonobese                                                                      | Old Obese    | $4.47*10^{-2}$  |
| Young Obese                                                                         | Old Nonobese | ns              |
| Young Obese                                                                         | Old Obese    | $4.47*10^{-2}$  |
| Old Nonobese                                                                        | Old Obese    | $4.47*10^{-2}$  |
| <i>Test: Scheirer-Hare-Ray test followed by Dunn post hoc correction</i>            |              |                 |
| <i>Sample size: Young Nonobese=5, Old Nonobese=5, Young Obese=5, Old Obese=5</i>    |              |                 |
| <b>Figure 2</b>                                                                     |              |                 |
| <b>Figure 2A</b>                                                                    |              |                 |
| Age                                                                                 |              | $6.13*10^{-6}$  |
| BMI                                                                                 |              | $3.88*10^{-12}$ |
| Age*BMI                                                                             |              | $3.12*10^{-2}$  |
| Young Nonobese                                                                      | Young Obese  | $8.30*10^{-9}$  |
| Young Nonobese                                                                      | Old Nonobese | $1.07*10^{-4}$  |
| Young Nonobese                                                                      | Old Obese    | $1.23*10^{-11}$ |
| Young Obese                                                                         | Old Nonobese | $1.68*10^{-3}$  |
| Young Obese                                                                         | Old Obese    | $6.77*10^{-3}$  |
| Old Nonobese                                                                        | Old Obese    | $8.02*10^{-7}$  |
| <i>Test: two-way ANOVA followed by Holm-Sidak post hoc correction</i>               |              |                 |
| <i>Sample size: Young Nonobese=10, Old Nonobese=12, Young Obese=10, Old Obese=8</i> |              |                 |
| <b>Figure 2B</b>                                                                    |              |                 |
| Age                                                                                 |              | $4.81*10^{-7}$  |
| BMI                                                                                 |              | $2.97*10^{-13}$ |
| Age*BMI                                                                             |              | ns              |
| Young Nonobese                                                                      | Young Obese  | $2.74*10^{-9}$  |
| Young Nonobese                                                                      | Old Nonobese | $4.66*10^{-5}$  |
| Young Nonobese                                                                      | Old Obese    | $5.45*10^{-13}$ |
| Young Obese                                                                         | Old Nonobese | $1.17*10^{-3}$  |
| Young Obese                                                                         | Old Obese    | $1.17*10^{-3}$  |
| Old Nonobese                                                                        | Old Obese    | $3.68*10^{-8}$  |
| <i>Test: two-way ANOVA followed by Holm-Sidak post hoc correction</i>               |              |                 |
| <i>Sample size: Young Nonobese=10, Old Nonobese=12, Young Obese=10, Old Obese=8</i> |              |                 |
| <b>Figure 2C</b>                                                                    |              |                 |
| Age                                                                                 |              | $1.27*10^{-4}$  |
| BMI                                                                                 |              | $2.22*10^{-8}$  |
| Age*BMI                                                                             |              | ns              |
| Young Nonobese                                                                      | Young Obese  | $1.17*10^{-5}$  |
| Young Nonobese                                                                      | Old Nonobese | $1.93*10^{-3}$  |

|                                                                                     |                |                 |
|-------------------------------------------------------------------------------------|----------------|-----------------|
| Young Nonobese                                                                      | Old Obese      | $2.48*10^{-8}$  |
| Young Obese                                                                         | Old Nonobese   | $4.26*10^{-2}$  |
| Young Obese                                                                         | Old Obese      | $4.26*10^{-2}$  |
| Old Nonobese                                                                        | Old Obese      | $2.83*10^{-4}$  |
| <i>Test: two-way ANOVA followed by Holm-Sidak post hoc correction</i>               |                |                 |
| <i>Sample size: Young Nonobese=10, Old Nonobese=12, Young Obese=10, Old Obese=8</i> |                |                 |
| <b>Figure 2D</b>                                                                    |                |                 |
| Age                                                                                 |                | $3.00*10^{-8}$  |
| BMI                                                                                 |                | $7.75*10^{-8}$  |
| Age*BMI                                                                             |                | ns              |
| Young Nonobese                                                                      | Young Obese    | $1.02*10^{-4}$  |
| Young Nonobese                                                                      | Old Nonobese   | $6.70*10^{-5}$  |
| Young Nonobese                                                                      | Old Obese      | $2.79*10^{-10}$ |
| Young Obese                                                                         | Old Nonobese   | ns              |
| Young Obese                                                                         | Old Obese      | $7.58*10^{-5}$  |
| Old Nonobese                                                                        | Old Obese      | $7.58*10^{-5}$  |
| <i>Test: two-way ANOVA followed by Holm-Sidak post hoc correction</i>               |                |                 |
| <i>Sample size: Young Nonobese=10, Old Nonobese=12, Young Obese=10, Old Obese=8</i> |                |                 |
| <b>Figure 2E</b>                                                                    |                |                 |
| Age                                                                                 |                | $2.43*10^{-6}$  |
| BMI                                                                                 |                | $3.00*10^{-13}$ |
| Age*BMI                                                                             |                | ns              |
| Young Nonobese                                                                      | Young Obese    | $7.55*10^{-9}$  |
| Young Nonobese                                                                      | Old Nonobese   | $4.54*10^{-4}$  |
| Young Nonobese                                                                      | Old Obese      | $1.33*10^{-12}$ |
| Young Obese                                                                         | Old Nonobese   | $4.54*10^{-4}$  |
| Young Obese                                                                         | Old Obese      | $6.91*10^{-4}$  |
| Old Nonobese                                                                        | Old Obese      | $1.36*10^{-8}$  |
| <i>Test: two-way ANOVA followed by Holm-Sidak post hoc correction</i>               |                |                 |
| <i>Sample size: Young Nonobese=10, Old Nonobese=12, Young Obese=10, Old Obese=8</i> |                |                 |
| <b>Figure 3</b>                                                                     |                |                 |
| <b>Figure 3A</b>                                                                    |                |                 |
| Within-subject effect                                                               |                | $9.23*10^{-21}$ |
| saline                                                                              | L-NAME         | $2.96*10^{-7}$  |
| saline                                                                              | SRT1720        | ns              |
| saline                                                                              | SRT1720+L-NAME | $1.33*10^{-7}$  |
| L-NAME                                                                              | SRT1720        | $3.34*10^{-8}$  |
| L-NAME                                                                              | SRT1720+L-NAME | ns              |
| SRT1720                                                                             | SRT1720+L-NAME | $5.78*10^{-10}$ |
| <i>Test: ANOVA for repeated measures followed by Holm-Sidak post hoc correction</i> |                |                 |
| <i>Sample size: Young Nonobese=10, Old Nonobese=27, Young Obese=8, Old Obese=20</i> |                |                 |
| <b>Figure 3B</b>                                                                    |                |                 |
| Within-subject effect                                                               |                | $2.32*10^{-37}$ |
| saline                                                                              | L-NAME         | $5.16*10^{-8}$  |
| saline                                                                              | SRT1720        | $6.89*10^{-10}$ |
| saline                                                                              | SRT1720+L-NAME | $1.80*10^{-11}$ |
| L-NAME                                                                              | SRT1720        | $2.14*10^{-15}$ |
| L-NAME                                                                              | SRT1720+L-NAME | $7.16*10^{-5}$  |
| SRT1720                                                                             | SRT1720+L-NAME | $2.39*10^{-18}$ |
| <i>Test: ANOVA for repeated measures followed by Holm-Sidak post hoc correction</i> |                |                 |
| <i>Sample size: Young Nonobese=10, Old Nonobese=27, Young Obese=8, Old Obese=20</i> |                |                 |

| <b>Figure 3C</b>                                                                    |                |                        |
|-------------------------------------------------------------------------------------|----------------|------------------------|
| Within-subject effect                                                               |                | 4.82*10 <sup>-14</sup> |
| saline                                                                              | L-NAME         | 8.08*10 <sup>-4</sup>  |
| saline                                                                              | SRT1720        | 7.76*10 <sup>-4</sup>  |
| saline                                                                              | SRT1720+L-NAME | 5.86*10 <sup>-4</sup>  |
| L-NAME                                                                              | SRT1720        | 2.72*10 <sup>-9</sup>  |
| L-NAME                                                                              | SRT1720+L-NAME | ns                     |
| SRT1720                                                                             | SRT1720+L-NAME | 1.98*10 <sup>-7</sup>  |
| <i>Test: ANOVA for repeated measures followed by Holm-Sidak post hoc correction</i> |                |                        |
| <i>Sample size: Young Nonobese=10, Old Nonobese=27, Young Obese=8, Old Obese=20</i> |                |                        |
| <b>Figure 3D</b>                                                                    |                |                        |
| Within-subject effect                                                               |                | 4.11*10 <sup>-31</sup> |
| saline                                                                              | L-NAME         | 7.73*10 <sup>-8</sup>  |
| saline                                                                              | SRT1720        | 3.57*10 <sup>-10</sup> |
| saline                                                                              | SRT1720+L-NAME | 9.66*10 <sup>-12</sup> |
| L-NAME                                                                              | SRT1720        | 3.12*10 <sup>-12</sup> |
| L-NAME                                                                              | SRT1720+L-NAME | ns                     |
| SRT1720                                                                             | SRT1720+L-NAME | 4.15*10 <sup>-12</sup> |
| <i>Test: ANOVA for repeated measures followed by Holm-Sidak post hoc correction</i> |                |                        |
| <i>Sample size: Young Nonobese=10, Old Nonobese=27, Young Obese=8, Old Obese=20</i> |                |                        |
| <b>Figure 3E</b>                                                                    |                |                        |
| <u>Baseline AUC comparison between groups</u>                                       |                |                        |
| Age                                                                                 |                | 4.26*10 <sup>-3</sup>  |
| BMI                                                                                 |                | 9.89*10 <sup>-8</sup>  |
| Age*BMI                                                                             |                | 8.48*10 <sup>-4</sup>  |
| <u>Young Nonobese group</u>                                                         |                |                        |
| Within-subject effect                                                               |                | 8.35*10 <sup>-13</sup> |
| saline                                                                              | L-NAME         | 9.19*10 <sup>-5</sup>  |
| saline                                                                              | SRT1720        | ns                     |
| saline                                                                              | SRT1720+L-NAME | 1.10*10 <sup>-3</sup>  |
| L-NAME                                                                              | SRT1720        | 1.02*10 <sup>-7</sup>  |
| L-NAME                                                                              | SRT1720+L-NAME | 1.61*10 <sup>-2</sup>  |
| SRT1720                                                                             | SRT1720+L-NAME | 1.75*10 <sup>-6</sup>  |
| <u>Old Nonobese group</u>                                                           |                |                        |
| Within-subject effect                                                               |                | 9.87*10 <sup>-32</sup> |
| saline                                                                              | L-NAME         | 9.81*10 <sup>-15</sup> |
| saline                                                                              | SRT1720        | 7.42*10 <sup>-9</sup>  |
| saline                                                                              | SRT1720+L-NAME | 6.45*10 <sup>-9</sup>  |
| L-NAME                                                                              | SRT1720        | 1.71*10 <sup>-13</sup> |
| L-NAME                                                                              | SRT1720+L-NAME | ns                     |
| SRT1720                                                                             | SRT1720+L-NAME | 4.16*10 <sup>-15</sup> |
| <u>Young Obese group</u>                                                            |                |                        |
| Within-subject effect                                                               |                | 1.95*10 <sup>-8</sup>  |
| saline                                                                              | L-NAME         | 3.50*10 <sup>-2</sup>  |
| saline                                                                              | SRT1720        | 1.31*10 <sup>-2</sup>  |
| saline                                                                              | SRT1720+L-NAME | ns                     |
| L-NAME                                                                              | SRT1720        | 3.96*10 <sup>-7</sup>  |
| L-NAME                                                                              | SRT1720+L-NAME | ns                     |
| SRT1720                                                                             | SRT1720+L-NAME | 2.02*10 <sup>-5</sup>  |
| <u>Old Obese group</u>                                                              |                |                        |
| Within-subject effect                                                               |                | 3.12*10 <sup>-15</sup> |
| saline                                                                              | L-NAME         | 4.94*10 <sup>-4</sup>  |
| saline                                                                              | SRT1720        | 2.39*10 <sup>-4</sup>  |

|                                                                                                                       |                |                        |                       |
|-----------------------------------------------------------------------------------------------------------------------|----------------|------------------------|-----------------------|
| saline                                                                                                                | SRT1720+L-NAME | 3.15*10 <sup>-4</sup>  |                       |
| L-NAME                                                                                                                | SRT1720        | 5.44*10 <sup>-7</sup>  |                       |
| L-NAME                                                                                                                | SRT1720+L-NAME | ns                     |                       |
| SRT1720                                                                                                               | SRT1720+L-NAME | 1.17*10 <sup>-8</sup>  |                       |
| <b>Figure 3F</b>                                                                                                      |                |                        |                       |
| Baseline maximal vasodilation to ACh comparison between groups                                                        |                |                        |                       |
| Age                                                                                                                   |                | 2.14*10 <sup>-18</sup> |                       |
| BMI                                                                                                                   |                | 1.74*10 <sup>-25</sup> |                       |
| Age*BMI                                                                                                               |                | 3.27*10 <sup>-8</sup>  |                       |
| <i>Test: two-way ANOVA followed by Holm-Sidak post hoc correction</i>                                                 |                |                        |                       |
| <i>Sample size: Young Nonobese=10, Old Nonobese=27, Young Obese=8, Old Obese=20</i>                                   |                |                        |                       |
| Other statistics relative to Figure 3F are the same reported in Figures 3A-D                                          |                |                        |                       |
| <b>Figure 3G</b>                                                                                                      |                |                        |                       |
| <u>ΔACh</u>                                                                                                           |                |                        |                       |
| Age                                                                                                                   |                | 3.43*10 <sup>-6</sup>  |                       |
| BMI                                                                                                                   |                | 2.04*10 <sup>-8</sup>  |                       |
| Age*BMI                                                                                                               |                | ns                     |                       |
| Young Nonobese                                                                                                        | Young Obese    | 2.94*10 <sup>-5</sup>  |                       |
| Young Nonobese                                                                                                        | Old Nonobese   | 9.37*10 <sup>-6</sup>  |                       |
| Young Nonobese                                                                                                        | Old Obese      | 7.03*10 <sup>-11</sup> |                       |
| Young Obese                                                                                                           | Old Nonobese   | ns                     |                       |
| Young Obese                                                                                                           | Old Obese      | ns                     |                       |
| Old Nonobese                                                                                                          | Old Obese      | 1.72*10 <sup>-4</sup>  |                       |
| <u>ΔL-NAME</u>                                                                                                        |                |                        |                       |
| Age                                                                                                                   |                | 2.36*10 <sup>-5</sup>  |                       |
| BMI                                                                                                                   |                | 6.05*10 <sup>-5</sup>  |                       |
| Age*BMI                                                                                                               |                | 1.6*10 <sup>-2</sup>   |                       |
| Young Nonobese                                                                                                        | Young Obese    | 7.02*10 <sup>-4</sup>  |                       |
| Young Nonobese                                                                                                        | Old Nonobese   | 7.70*10 <sup>-6</sup>  |                       |
| Young Nonobese                                                                                                        | Old Obese      | 1.42*10 <sup>-7</sup>  |                       |
| Young Obese                                                                                                           | Old Nonobese   | ns                     |                       |
| Young Obese                                                                                                           | Old Obese      | ns                     |                       |
| Old Nonobese                                                                                                          | Old Obese      | ns                     |                       |
| <b>Figure 4</b>                                                                                                       |                |                        |                       |
| <b>Figure 4A</b>                                                                                                      |                |                        |                       |
| Unadjusted                                                                                                            | r=0.373        | x=0.226                | 2.22*10 <sup>-3</sup> |
| Adjusted                                                                                                              | r=0.729        | x=0.247                | 3.31*10 <sup>-4</sup> |
| <i>Test: linear regression unadjusted and adjusted for BMI, sex, mean blood pressure, creatinine and HOMA-IR</i>      |                |                        |                       |
| <i>Sample size: Young Nonobese=10, Old Nonobese=27, Young Obese=8, Old Obese=20</i>                                   |                |                        |                       |
| <b>Figure 4B</b>                                                                                                      |                |                        |                       |
| Unadjusted                                                                                                            | r=0.488        | x=0.393                | 3.73*10 <sup>-5</sup> |
| Adjusted                                                                                                              | r=0.729        | x=0.322                | 2.82*10 <sup>-2</sup> |
| <i>Test: linear regression unadjusted and adjusted for age, sex, mean blood pressure, creatinine and HOMA-IR</i>      |                |                        |                       |
| <i>Sample size: Young Nonobese=10, Old Nonobese=27, Young Obese=8, Old Obese=20</i>                                   |                |                        |                       |
| <b>Figure 4C</b>                                                                                                      |                |                        |                       |
| Unadjusted                                                                                                            | r=0.576        | x=2.460                | 5.18*10 <sup>-7</sup> |
| Adjusted                                                                                                              | r=0.800        | x=3.180                | 2.30*10 <sup>-4</sup> |
| <i>Test: linear regression unadjusted and adjusted for age, BMI, sex, mean blood pressure, creatinine and HOMA-IR</i> |                |                        |                       |

|                                                                                                                       |                          |         |                       |
|-----------------------------------------------------------------------------------------------------------------------|--------------------------|---------|-----------------------|
| <i>Sample size: Young Nonobese=10, Old Nonobese=27, Young Obese=8, Old Obese=20</i>                                   |                          |         |                       |
| <b>Figure 4D</b>                                                                                                      |                          |         |                       |
| Unadjusted                                                                                                            | r=0.445                  | x=0.282 | 2.05*10 <sup>-4</sup> |
| Adjusted                                                                                                              | r=0.642                  | x=0.305 | 1.85*10 <sup>-4</sup> |
| <i>Test: linear regression unadjusted and adjusted for BMI, sex, mean blood pressure, creatinine and HOMA-IR</i>      |                          |         |                       |
| <i>Sample size: Young Nonobese=10, Old Nonobese=27, Young Obese=8, Old Obese=20</i>                                   |                          |         |                       |
| <b>Figure 4E</b>                                                                                                      |                          |         |                       |
| Unadjusted                                                                                                            | r=0.315                  | x=0.265 | 1.07*10 <sup>-2</sup> |
| Adjusted                                                                                                              |                          |         | ns                    |
| <i>Test: linear regression unadjusted and adjusted for age, sex, mean blood pressure, creatinine and HOMA-IR</i>      |                          |         |                       |
| <i>Sample size: Young Nonobese=10, Old Nonobese=27, Young Obese=8, Old Obese=20</i>                                   |                          |         |                       |
| <b>Figure 4F</b>                                                                                                      |                          |         |                       |
| Unadjusted                                                                                                            | r=0.435                  | x=1.940 | 2.95*10 <sup>-4</sup> |
| Adjusted                                                                                                              | r=0.724                  | x=3.397 | 9.60*10 <sup>-4</sup> |
| <i>Test: linear regression unadjusted and adjusted for age, BMI, sex, mean blood pressure, creatinine and HOMA-IR</i> |                          |         |                       |
| <i>Sample size: Young Nonobese=10, Old Nonobese=27, Young Obese=8, Old Obese=20</i>                                   |                          |         |                       |
| <b>Figure 5</b>                                                                                                       |                          |         |                       |
| <b>Figure 5A</b>                                                                                                      |                          |         |                       |
| <u>saline</u>                                                                                                         |                          |         | 3.06*10 <sup>-3</sup> |
| Young Nonobese                                                                                                        | Young Nonobese scr.siRNA |         | ns                    |
| Young Nonobese                                                                                                        | Young Nonobese siRNA     |         | 2.45*10 <sup>-2</sup> |
| Young Nonobese scr.siRNA                                                                                              | Young Nonobese siRNA     |         | 2.45*10 <sup>-2</sup> |
| <u>L-NAME</u>                                                                                                         |                          |         | ns                    |
| Young Nonobese                                                                                                        | Young Nonobese scr.siRNA |         | ns                    |
| Young Nonobese                                                                                                        | Young Nonobese siRNA     |         | ns                    |
| Young Nonobese scr.siRNA                                                                                              | Young Nonobese siRNA     |         | ns                    |
| <u>saline vs L-NAME</u>                                                                                               |                          |         |                       |
| Young Nonobese                                                                                                        |                          |         | 2.53*10 <sup>-2</sup> |
| Young Nonobese scr.siRNA                                                                                              |                          |         | 2.53*10 <sup>-2</sup> |
| Young Nonobese siRNA                                                                                                  |                          |         | 2.53*10 <sup>-2</sup> |
| <i>Test: Kruskal-Wallis test with Dwass-Steel-Critchlow-Flinger post-hoc test</i>                                     |                          |         |                       |
| <i>Sample size: 5</i>                                                                                                 |                          |         |                       |
| <b>Figure 5B-C</b>                                                                                                    |                          |         |                       |
| <u>sc-40986 mitoSOX</u>                                                                                               |                          |         | 8.08*10 <sup>-3</sup> |
| Young Nonobese                                                                                                        | Young Nonobese scr.siRNA |         | ns                    |
| Young Nonobese                                                                                                        | Young Nonobese siRNA     |         | 2.45*10 <sup>-2</sup> |
| Young Nonobese scr.siRNA                                                                                              | Young Nonobese siRNA     |         | 2.40*10 <sup>-2</sup> |
| <i>Test: Kruskal-Wallis test with Dwass-Steel-Critchlow-Flinger post-hoc test</i>                                     |                          |         |                       |
| <i>Sample size: 5</i>                                                                                                 |                          |         |                       |
| <u>sc-40986 DAF-FM</u>                                                                                                |                          |         | 8.93*10 <sup>-3</sup> |
| Young Nonobese                                                                                                        | Young Nonobese scr.siRNA |         | 2.40*10 <sup>-2</sup> |
| Young Nonobese                                                                                                        | Young Nonobese siRNA     |         | 2.40*10 <sup>-2</sup> |
| Young Nonobese scr.siRNA                                                                                              | Young Nonobese siRNA     |         | 2.40*10 <sup>-2</sup> |
| <i>Test: Kruskal-Wallis test with Dwass-Steel-Critchlow-Flinger post-hoc test</i>                                     |                          |         |                       |
| <i>Sample size: 5</i>                                                                                                 |                          |         |                       |
| <u>SRT1720 mitoSOX</u>                                                                                                |                          |         | 1.93*10 <sup>-3</sup> |
| Young Nonobese                                                                                                        | Old Obese                |         | 2.45*10 <sup>-2</sup> |
| Young Nonobese                                                                                                        | Old Obese SRT1720        |         | 2.45*10 <sup>-2</sup> |

|                                                                                                 |                     |                 |
|-------------------------------------------------------------------------------------------------|---------------------|-----------------|
| Old Obese                                                                                       | Old Obese SRT1720   | $2.45*10^{-2}$  |
| <i>Test: Kruskal-Wallis test with Dwass-Steel-Critchlow-Flinger post-hoc test</i>               |                     |                 |
| <i>Sample size: 5</i>                                                                           |                     |                 |
| <b>SRT1720 DAF-FM</b>                                                                           |                     | $1.93*10^{-3}$  |
| Young Nonobese                                                                                  | Old Obese           | $2.45*10^{-2}$  |
| Young Nonobese                                                                                  | Old Obese SRT1720   | $2.45*10^{-2}$  |
| Old Obese                                                                                       | Old Obese SRT1720   | $2.45*10^{-2}$  |
| <i>Test: Kruskal-Wallis test with Dwass-Steel-Critchlow-Flinger post-hoc test</i>               |                     |                 |
| <i>Sample size: 5</i>                                                                           |                     |                 |
| <b>Figure 5D-E</b>                                                                              |                     |                 |
| Within-subject effect                                                                           |                     | $1.27*10^{-17}$ |
| saline                                                                                          | SRT1720             | $5.63*10^{-5}$  |
| saline                                                                                          | mitoTEMPO           | $4.77*10^{-6}$  |
| saline                                                                                          | gp91dstat           | $2.68*10^{-5}$  |
| saline                                                                                          | SRT1720+mitoTEMPO   | $1.95*10^{-3}$  |
| saline                                                                                          | SRT1720+gp91dstat   | $6.25*10^{-6}$  |
| saline                                                                                          | mitoTEMPO+gp91dstat | $4.77*10^{-6}$  |
| SRT1720                                                                                         | mitoTEMPO           | ns              |
| SRT1720                                                                                         | gp91dstat           | $3.5*10^{-3}$   |
| SRT1720                                                                                         | SRT1720+mitoTEMPO   | ns              |
| SRT1720                                                                                         | SRT1720+gp91dstat   | ns              |
| SRT1720                                                                                         | mitoTEMPO+gp91dstat | ns              |
| mitoTEMPO                                                                                       | gp91dstat           | $5.81*10^{-4}$  |
| mitoTEMPO                                                                                       | SRT1720+mitoTEMPO   | ns              |
| mitoTEMPO                                                                                       | SRT1720+gp91dstat   | $3.97*10^{-3}$  |
| mitoTEMPO                                                                                       | mitoTEMPO+gp91dstat | $2.09*10^{-2}$  |
| gp91dstat                                                                                       | SRT1720+mitoTEMPO   | $3.07*10^{-2}$  |
| gp91dstat                                                                                       | SRT1720+gp91dstat   | $2.09*10^{-4}$  |
| gp91dstat                                                                                       | mitoTEMPO+gp91dstat | $5.96*10^{-4}$  |
| SRT1720+mitoTEMPO                                                                               | SRT1720+gp91dstat   | ns              |
| SRT1720+mitoTEMPO                                                                               | mitoTEMPO+gp91dstat | ns              |
| SRT1720+gp91dstat                                                                               | mitoTEMPO+gp91dstat | ns              |
| <i>Test: ANOVA for repeated measures followed by a post-hoc test with Holm-Sidak correction</i> |                     |                 |
| <i>Sample size: 6</i>                                                                           |                     |                 |
| <b>Figure 5F-I</b>                                                                              |                     |                 |
| Swelling 10 min                                                                                 |                     | $1.78*10^{-2}$  |
| Young Nonobese                                                                                  | Old Obese           | $4.31*10^{-2}$  |
| Young Nonobese                                                                                  | Old Obese SRT1720   | ns              |
| Old Obese                                                                                       | Old Obese SRT1720   | ns              |
| Swelling 20 min                                                                                 |                     | $3.06*10^{-3}$  |
| Young Nonobese                                                                                  | Old Obese           | $2.45*10^{-2}$  |
| Young Nonobese                                                                                  | Old Obese SRT1720   | ns              |
| Old Obese                                                                                       | Old Obese SRT1720   | $2.45*10^{-2}$  |
| <i>Test: Kruskal-Wallis test with Dwass-Steel-Critchlow-Flinger post-hoc test</i>               |                     |                 |
| <i>Sample size: 5</i>                                                                           |                     |                 |
| <b>Figure 6</b>                                                                                 |                     |                 |
| <b>Figure 6A</b>                                                                                |                     |                 |
| p66 <sup>Shc</sup>                                                                              |                     | $9.19*10^{-3}$  |
| Young Nonobese                                                                                  | Old Obese           | $2.45*10^{-2}$  |
| Young Nonobese                                                                                  | Old Obese SRT1720   | ns              |
| Old Obese                                                                                       | Old Obese SRT1720   | $2.45*10^{-2}$  |

|                                                                                   |                   |                       |
|-----------------------------------------------------------------------------------|-------------------|-----------------------|
| <i>Test: Kruskal-Wallis test with Dwass-Steel-Critchlow-Flinger post-hoc test</i> |                   |                       |
| <i>Sample size: 5</i>                                                             |                   |                       |
| <b>Figure 6B</b>                                                                  |                   |                       |
| ArgII                                                                             |                   | 8.15*10 <sup>-3</sup> |
| Young Nonobese                                                                    | Old Obese         | 2.45*10 <sup>-2</sup> |
| Young Nonobese                                                                    | Old Obese SRT1720 | ns                    |
| Old Obese                                                                         | Old Obese SRT1720 | 2.45*10 <sup>-2</sup> |
| <i>Test: Kruskal-Wallis test with Dwass-Steel-Critchlow-Flinger post-hoc test</i> |                   |                       |
| <i>Sample size: 5</i>                                                             |                   |                       |
| <b>Figure 6C</b>                                                                  |                   |                       |
| SIRT3                                                                             |                   | 3.06*10 <sup>-3</sup> |
| Young Nonobese                                                                    | Old Obese         | 2.45*10 <sup>-2</sup> |
| Young Nonobese                                                                    | Old Obese SRT1720 | ns                    |
| Old Obese                                                                         | Old Obese SRT1720 | 2.45*10 <sup>-2</sup> |
| <i>Test: Kruskal-Wallis test with Dwass-Steel-Critchlow-Flinger post-hoc test</i> |                   |                       |
| <i>Sample size: 5</i>                                                             |                   |                       |
| <b>Figure 6D</b>                                                                  |                   |                       |
| SIRT1 on p66 <sup>Shc</sup> promoter                                              |                   | 1.93*10 <sup>-3</sup> |
| Young Nonobese                                                                    | Old Obese         | 2.45*10 <sup>-2</sup> |
| Young Nonobese                                                                    | Old Obese SRT1720 | 2.45*10 <sup>-2</sup> |
| Old Obese                                                                         | Old Obese SRT1720 | 2.45*10 <sup>-2</sup> |
| <i>Test: Kruskal-Wallis test with Dwass-Steel-Critchlow-Flinger post-hoc test</i> |                   |                       |
| <i>Sample size: 5</i>                                                             |                   |                       |
| <b>Figure 6E</b>                                                                  |                   |                       |
| SIRT1 on ArgII promoter                                                           |                   | 3.74*10 <sup>-3</sup> |
| Young Nonobese                                                                    | Old Obese         | 2.45*10 <sup>-2</sup> |
| Young Nonobese                                                                    | Old Obese SRT1720 | ns                    |
| Old Obese                                                                         | Old Obese SRT1720 | 2.45*10 <sup>-2</sup> |
| <i>Test: Kruskal-Wallis test with Dwass-Steel-Critchlow-Flinger post-hoc test</i> |                   |                       |
| <i>Sample size: 5</i>                                                             |                   |                       |
| <b>Figure 6F</b>                                                                  |                   |                       |
| ATP6                                                                              |                   | 1.93*10 <sup>-3</sup> |
| Young Nonobese                                                                    | Old Obese         | 2.45*10 <sup>-2</sup> |
| Young Nonobese                                                                    | Old Obese SRT1720 | 2.45*10 <sup>-2</sup> |
| Old Obese                                                                         | Old Obese SRT1720 | 2.45*10 <sup>-2</sup> |
| <i>Test: Kruskal-Wallis test with Dwass-Steel-Critchlow-Flinger post-hoc test</i> |                   |                       |
| <i>Sample size: 5</i>                                                             |                   |                       |
| <b>Figure 6H</b>                                                                  |                   |                       |
| CytB                                                                              |                   | 1.93*10 <sup>-3</sup> |
| Young Nonobese                                                                    | Old Obese         | 2.45*10 <sup>-2</sup> |
| Young Nonobese                                                                    | Old Obese SRT1720 | 2.45*10 <sup>-2</sup> |
| Old Obese                                                                         | Old Obese SRT1720 | 2.45*10 <sup>-2</sup> |
| <i>Test: Kruskal-Wallis test with Dwass-Steel-Critchlow-Flinger post-hoc test</i> |                   |                       |
| <i>Sample size: 5</i>                                                             |                   |                       |
| <b>Figure 6H</b>                                                                  |                   |                       |
| ND2                                                                               |                   | 3.74*10 <sup>-3</sup> |
| Young Nonobese                                                                    | Old Obese         | 2.45*10 <sup>-2</sup> |
| Young Nonobese                                                                    | Old Obese SRT1720 | ns                    |
| Old Obese                                                                         | Old Obese SRT1720 | 2.45*10 <sup>-2</sup> |
| <i>Test: Kruskal-Wallis test with Dwass-Steel-Critchlow-Flinger post-hoc test</i> |                   |                       |
| <i>Sample size: 5</i>                                                             |                   |                       |
| <b>Figure 6I</b>                                                                  |                   |                       |
| ND5                                                                               |                   | 3.06*10 <sup>-3</sup> |

|                                                                                                 |                          |                        |
|-------------------------------------------------------------------------------------------------|--------------------------|------------------------|
| Young Nonobese                                                                                  | Old Obese                | $2.45 \times 10^{-2}$  |
| Young Nonobese                                                                                  | Old Obese SRT1720        | ns                     |
| Old Obese                                                                                       | Old Obese SRT1720        | $2.45 \times 10^{-2}$  |
| <i>Test: Kruskal-Wallis test with Dwass-Steel-Critchlow-Flinger post-hoc test</i>               |                          |                        |
| <i>Sample size: 5</i>                                                                           |                          |                        |
| <b>Figure 7</b>                                                                                 |                          |                        |
| <b>Figure 7A</b>                                                                                |                          |                        |
| Within-subject effect                                                                           |                          | ns                     |
| saline                                                                                          | SRT1720                  | ns                     |
| saline                                                                                          | mitoTEMPO                | ns                     |
| SRT1720                                                                                         | mitoTEMPO                | ns                     |
| <i>Test: Friedman test followed by Durbin-Conover as a post-hoc test</i>                        |                          |                        |
| <i>Sample size: 5</i>                                                                           |                          |                        |
| <b>Figure 7B</b>                                                                                |                          |                        |
| Within-subject effect                                                                           |                          | $7.76 \times 10^{-12}$ |
| saline                                                                                          | SRT1720                  | $2.94 \times 10^{-7}$  |
| saline                                                                                          | mitoTEMPO                | $1.59 \times 10^{-7}$  |
| SRT1720                                                                                         | mitoTEMPO                | ns                     |
| <i>Test: ANOVA for repeated measures followed by a post-hoc test with Holm-Sidak correction</i> |                          |                        |
| <i>Sample size: 16</i>                                                                          |                          |                        |
| <b>Figure 7C</b>                                                                                |                          |                        |
| Within-subject effect                                                                           |                          | $5.81 \times 10^{-6}$  |
| saline                                                                                          | SRT1720                  | $3.46 \times 10^{-5}$  |
| saline                                                                                          | mitoTEMPO                | $1.67 \times 10^{-6}$  |
| SRT1720                                                                                         | mitoTEMPO                | ns                     |
| <i>Test: ANOVA for repeated measures followed by a post-hoc test with Holm-Sidak correction</i> |                          |                        |
| <i>Sample size: 8</i>                                                                           |                          |                        |
| <b>Figure 7D</b>                                                                                |                          |                        |
| Within-subject effect                                                                           |                          | $4.78 \times 10^{-23}$ |
| saline                                                                                          | SRT1720                  | $7.33 \times 10^{-13}$ |
| saline                                                                                          | mitoTEMPO                | $4.00 \times 10^{-26}$ |
| SRT1720                                                                                         | mitoTEMPO                | ns                     |
| <i>Test: ANOVA for repeated measures followed by a post-hoc test with Holm-Sidak correction</i> |                          |                        |
| <i>Sample size: 22</i>                                                                          |                          |                        |
| <b>Supplementary Figure 1B</b>                                                                  |                          |                        |
| mitoPY1                                                                                         |                          | $1.18 \times 10^{-2}$  |
| ENZ-53013                                                                                       |                          | $1.25 \times 10^{-2}$  |
| <i>Test: Kruskal-Wallis test</i>                                                                |                          |                        |
| <i>Sample size: 3 for each group</i>                                                            |                          |                        |
| <b>Supplementary Figure 2B</b>                                                                  |                          |                        |
| SIRT1                                                                                           |                          | $9.00 \times 10^{-3}$  |
| Young Nonobese                                                                                  | Young Nonobese scr.siRNA | ns                     |
| Young Nonobese                                                                                  | Young Nonobese siRNA     | $2.45 \times 10^{-2}$  |
| Young Nonobese scr.siRNA                                                                        | Young Nonobese siRNA     | $2.45 \times 10^{-2}$  |
| <i>Test: Kruskal-Wallis test with Dwass-Steel-Critchlow-Flinger post-hoc test</i>               |                          |                        |
| <i>Sample size: 5 for each group</i>                                                            |                          |                        |
| <b>Supplementary Figure 3</b>                                                                   |                          |                        |



|                                                                                  |           |                       |
|----------------------------------------------------------------------------------|-----------|-----------------------|
| SIRT1 on p66 <sup>Shc</sup> promoter                                             |           | 9.98*10 <sup>-8</sup> |
| SIRT1 on ArgII promoter                                                          |           | 1.27*10 <sup>-5</sup> |
| <i>Test: independent samples Student's t test</i>                                |           |                       |
| <i>Sample size: Young Nonobese=12, Old Obese=18</i>                              |           |                       |
| <b>Supplementary Figure 4</b>                                                    |           |                       |
| <b>Supplementary Figure 4A</b>                                                   |           |                       |
| Within-subject effect                                                            |           | ns                    |
| saline                                                                           | SRT1720   | ns                    |
| saline                                                                           | mitoTEMPO | ns                    |
| saline                                                                           | rotenone  | ns                    |
| saline                                                                           | tempol    | ns                    |
| SRT1720                                                                          | mitoTEMPO | ns                    |
| SRT1720                                                                          | rotenone  | ns                    |
| SRT1720                                                                          | tempol    | ns                    |
| mitoTEMPO                                                                        | rotenone  | ns                    |
| mitoTEMPO                                                                        | tempol    | ns                    |
| rotenone                                                                         | tempol    | ns                    |
| <i>Test: Friedman test followed by Durbin-Conover as a post-hoc test</i>         |           |                       |
| <i>Sample size: Young Nonobese=3, Young Obese=3, Old Nonobese=3, Old Obese=3</i> |           |                       |
| <b>Supplementary Figure 4B</b>                                                   |           |                       |
| Within-subject effect                                                            |           | 1.80*10 <sup>-3</sup> |
| saline                                                                           | SRT1720   | ns                    |
| saline                                                                           | mitoTEMPO | ns                    |
| saline                                                                           | rotenone  | ns                    |
| saline                                                                           | tempol    | ns                    |
| SRT1720                                                                          | mitoTEMPO | ns                    |
| SRT1720                                                                          | rotenone  | ns                    |
| SRT1720                                                                          | tempol    | ns                    |
| mitoTEMPO                                                                        | rotenone  | ns                    |
| mitoTEMPO                                                                        | tempol    | ns                    |
| rotenone                                                                         | tempol    | ns                    |
| <i>Test: Friedman test followed by Durbin-Conover as a post-hoc test</i>         |           |                       |
| <i>Sample size: Young Nonobese=3, Young Obese=3, Old Nonobese=3, Old Obese=3</i> |           |                       |
| <b>Supplementary Figure 4C</b>                                                   |           |                       |
| Within-subject effect                                                            |           | 1.51*10 <sup>-2</sup> |
| saline                                                                           | SRT1720   | ns                    |
| saline                                                                           | mitoTEMPO | ns                    |
| saline                                                                           | rotenone  | ns                    |
| saline                                                                           | tempol    | ns                    |
| SRT1720                                                                          | mitoTEMPO | ns                    |
| SRT1720                                                                          | rotenone  | ns                    |
| SRT1720                                                                          | tempol    | ns                    |
| mitoTEMPO                                                                        | rotenone  | ns                    |
| mitoTEMPO                                                                        | tempol    | ns                    |
| rotenone                                                                         | tempol    | ns                    |
| <i>Test: Friedman test followed by Durbin-Conover as a post-hoc test</i>         |           |                       |
| <i>Sample size: Young Nonobese=3, Young Obese=3, Old Nonobese=3, Old Obese=3</i> |           |                       |
| <b>Supplementary Figure 4D</b>                                                   |           |                       |
| Within-subject effect                                                            |           | 9.00*10 <sup>-4</sup> |
| saline                                                                           | SRT1720   | ns                    |
| saline                                                                           | mitoTEMPO | ns                    |

|                                                                                      |              |                        |
|--------------------------------------------------------------------------------------|--------------|------------------------|
| saline                                                                               | rotenone     | ns                     |
| saline                                                                               | tempol       | ns                     |
| SRT1720                                                                              | mitoTEMPO    | ns                     |
| SRT1720                                                                              | rotenone     | ns                     |
| SRT1720                                                                              | tempol       | ns                     |
| mitoTEMPO                                                                            | rotenone     | ns                     |
| mitoTEMPO                                                                            | tempol       | ns                     |
| rotenone                                                                             | tempol       | ns                     |
| <i>Test: Friedman test followed by Durbin-Conover as a post-hoc test</i>             |              |                        |
| <i>Sample size: Young Nonobese=3, Young Obese=3, Old Nonobese=3, Old Obese=3</i>     |              |                        |
| <b>Table 1</b>                                                                       |              |                        |
| <b>Male sex</b>                                                                      |              |                        |
| $\chi^2$                                                                             |              | 5.92*10 <sup>-4</sup>  |
| <i>Test: chi-Squared test</i>                                                        |              |                        |
| <i>Sample size: Young Nonobese=12, Young Obese=15, Old Nonobese=36, Old Obese=32</i> |              |                        |
| <b>Age</b>                                                                           |              |                        |
| Age                                                                                  |              | 6.12*10 <sup>-21</sup> |
| BMI                                                                                  |              | 9.62*10 <sup>-3</sup>  |
| Age*BMI                                                                              |              | ns                     |
| Young Nonobese                                                                       | Young Obese  | ns                     |
| Young Nonobese                                                                       | Old Nonobese | 1.15*10 <sup>-13</sup> |
| Young Nonobese                                                                       | Old Obese    | 1.38*10 <sup>-8</sup>  |
| Young Obese                                                                          | Old Nonobese | 8.98*10 <sup>-18</sup> |
| Young Obese                                                                          | Old Obese    | 5.14*10 <sup>-12</sup> |
| Old Nonobese                                                                         | Old Obese    | 1.95*10 <sup>-3</sup>  |
| <i>Test: two-way ANOVA followed by Holm-Sidak post hoc correction</i>                |              |                        |
| <i>Sample size: Young Nonobese=12, Young Obese=15, Old Nonobese=36, Old Obese=32</i> |              |                        |
| <b>BMI</b>                                                                           |              |                        |
| Age                                                                                  |              | ns                     |
| BMI                                                                                  |              | 4.22*10 <sup>-38</sup> |
| Age*BMI                                                                              |              | ns                     |
| Young Nonobese                                                                       | Young Obese  | 2.75*10 <sup>-21</sup> |
| Young Nonobese                                                                       | Old Nonobese | ns                     |
| Young Nonobese                                                                       | Old Obese    | 3.24*10 <sup>-27</sup> |
| Young Obese                                                                          | Old Nonobese | 2.28*10 <sup>-26</sup> |
| Young Obese                                                                          | Old Obese    | ns                     |
| Old Nonobese                                                                         | Old Obese    | 1.51*10 <sup>-36</sup> |
| <i>Test: two-way ANOVA followed by Holm-Sidak post hoc correction</i>                |              |                        |
| <i>Sample size: Young Nonobese=12, Young Obese=15, Old Nonobese=36, Old Obese=32</i> |              |                        |
| <b>Systolic blood pressure</b>                                                       |              |                        |
| Age                                                                                  |              | ns                     |
| BMI                                                                                  |              | ns                     |
| Age*BMI                                                                              |              | ns                     |
| Young Nonobese                                                                       | Young Obese  | ns                     |
| Young Nonobese                                                                       | Old Nonobese | ns                     |
| Young Nonobese                                                                       | Old Obese    | ns                     |
| Young Obese                                                                          | Old Nonobese | ns                     |
| Young Obese                                                                          | Old Obese    | ns                     |
| Old Nonobese                                                                         | Old Obese    | ns                     |
| <i>Test: two-way ANOVA followed by Holm-Sidak post hoc correction</i>                |              |                        |
| <i>Sample size: Young Nonobese=12, Young Obese=15, Old Nonobese=36, Old Obese=32</i> |              |                        |

| <b>Diastolic blood pressure</b>                                                      |              |                        |
|--------------------------------------------------------------------------------------|--------------|------------------------|
| Age                                                                                  |              | 2.25*10 <sup>-3</sup>  |
| BMI                                                                                  |              | ns                     |
| Age*BMI                                                                              |              | ns                     |
| Young Nonobese                                                                       | Young Obese  | ns                     |
| Young Nonobese                                                                       | Old Nonobese | ns                     |
| Young Nonobese                                                                       | Old Obese    | ns                     |
| Young Obese                                                                          | Old Nonobese | ns                     |
| Young Obese                                                                          | Old Obese    | 4.86*10 <sup>-2</sup>  |
| Old Nonobese                                                                         | Old Obese    | ns                     |
| <i>Test: two-way ANOVA followed by Holm-Sidak post hoc correction</i>                |              |                        |
| <i>Sample size: Young Nonobese=12, Young Obese=15, Old Nonobese=36, Old Obese=32</i> |              |                        |
| <b>Fasting plasma glucose</b>                                                        |              |                        |
| Age                                                                                  |              | 1.42*10 <sup>-2</sup>  |
| BMI                                                                                  |              | ns                     |
| Age*BMI                                                                              |              | ns                     |
| Young Nonobese                                                                       | Young Obese  | ns                     |
| Young Nonobese                                                                       | Old Nonobese | ns                     |
| Young Nonobese                                                                       | Old Obese    | ns                     |
| Young Obese                                                                          | Old Nonobese | ns                     |
| Young Obese                                                                          | Old Obese    | ns                     |
| Old Nonobese                                                                         | Old Obese    | ns                     |
| <i>Test: two-way ANOVA followed by Holm-Sidak post hoc correction</i>                |              |                        |
| <i>Sample size: Young Nonobese=12, Young Obese=15, Old Nonobese=36, Old Obese=32</i> |              |                        |
| <b>Fasting plasma insulin</b>                                                        |              |                        |
| Age                                                                                  |              | 1.57*10 <sup>-2</sup>  |
| BMI                                                                                  |              | 2.87*10 <sup>-53</sup> |
| Age*BMI                                                                              |              | ns                     |
| Young Nonobese                                                                       | Young Obese  | 6.32*10 <sup>-36</sup> |
| Young Nonobese                                                                       | Old Nonobese | ns                     |
| Young Nonobese                                                                       | Old Obese    | 2.74*10 <sup>-41</sup> |
| Young Obese                                                                          | Old Nonobese | 8.05*10 <sup>-41</sup> |
| Young Obese                                                                          | Old Obese    | ns                     |
| Old Nonobese                                                                         | Old Obese    | 7.69*10 <sup>-50</sup> |
| <i>Test: two-way ANOVA followed by Holm-Sidak post hoc correction</i>                |              |                        |
| <i>Sample size: Young Nonobese=12, Young Obese=15, Old Nonobese=36, Old Obese=32</i> |              |                        |
| <b>HOMA-IR</b>                                                                       |              |                        |
| Age                                                                                  |              | 4.75*10 <sup>-3</sup>  |
| BMI                                                                                  |              | 1.64*10 <sup>-25</sup> |
| Age*BMI                                                                              |              | ns                     |
| Young Nonobese                                                                       | Young Obese  | 2.23*10 <sup>-12</sup> |
| Young Nonobese                                                                       | Old Nonobese | ns                     |
| Young Nonobese                                                                       | Old Obese    | 3.52*10 <sup>-19</sup> |
| Young Obese                                                                          | Old Nonobese | 1.35*10 <sup>-13</sup> |
| Young Obese                                                                          | Old Obese    | 2.07*10 <sup>-2</sup>  |
| Old Nonobese                                                                         | Old Obese    | 2.81*10 <sup>-24</sup> |
| <i>Test: two-way ANOVA followed by Holm-Sidak post hoc correction</i>                |              |                        |
| <i>Sample size: Young Nonobese=12, Young Obese=15, Old Nonobese=36, Old Obese=32</i> |              |                        |
| <b>eGFR</b>                                                                          |              |                        |
| Age                                                                                  |              | 9.35*10 <sup>-4</sup>  |
| BMI                                                                                  |              | 9.48*10 <sup>-7</sup>  |
| Age*BMI                                                                              |              | ns                     |
| Young Nonobese                                                                       | Young Obese  | 4.00*10 <sup>-3</sup>  |

|                                                                                      |              |                 |
|--------------------------------------------------------------------------------------|--------------|-----------------|
| Young Nonobese                                                                       | Old Nonobese | $3.12*10^{-4}$  |
| Young Nonobese                                                                       | Old Obese    | $1.14*10^{-3}$  |
| Young Obese                                                                          | Old Nonobese | $2.43*10^{-8}$  |
| Young Obese                                                                          | Old Obese    | $1.68*10^{-2}$  |
| Old Nonobese                                                                         | Old Obese    | $1.01*10^{-4}$  |
| <i>Test: two-way ANOVA followed by Holm-Sidak post hoc correction</i>                |              |                 |
| <i>Sample size: Young Nonobese=12, Young Obese=15, Old Nonobese=36, Old Obese=32</i> |              |                 |
| <b>Total cholesterol</b>                                                             |              |                 |
| Age                                                                                  |              | ns              |
| BMI                                                                                  |              | ns              |
| Age*BMI                                                                              |              | ns              |
| Young Nonobese                                                                       | Young Obese  | ns              |
| Young Nonobese                                                                       | Old Nonobese | ns              |
| Young Nonobese                                                                       | Old Obese    | ns              |
| Young Obese                                                                          | Old Nonobese | ns              |
| Young Obese                                                                          | Old Obese    | ns              |
| Old Nonobese                                                                         | Old Obese    | ns              |
| <i>Test: two-way ANOVA followed by Holm-Sidak post hoc correction</i>                |              |                 |
| <i>Sample size: Young Nonobese=12, Young Obese=15, Old Nonobese=36, Old Obese=32</i> |              |                 |
| <b>Media-to-lumen ratio</b>                                                          |              |                 |
| Age                                                                                  |              | $8.97*10^{-5}$  |
| BMI                                                                                  |              | $7.41*10^{-26}$ |
| Age*BMI                                                                              |              | $2.62*10^{-2}$  |
| Young Nonobese                                                                       | Young Obese  | $8.45*10^{-11}$ |
| Young Nonobese                                                                       | Old Nonobese | ns              |
| Young Nonobese                                                                       | Old Obese    | $1.76*10^{-21}$ |
| Young Obese                                                                          | Old Nonobese | $1.68*10^{-11}$ |
| Young Obese                                                                          | Old Obese    | $1.91*10^{-5}$  |
| Old Nonobese                                                                         | Old Obese    | $1.53*10^{-26}$ |
| <i>Test: two-way ANOVA followed by Holm-Sidak post hoc correction</i>                |              |                 |
| <i>Sample size: Young Nonobese=12, Young Obese=15, Old Nonobese=36, Old Obese=32</i> |              |                 |
| <b>Media cross-sectional area</b>                                                    |              |                 |
| Age                                                                                  |              | ns              |
| BMI                                                                                  |              | $2.08*10^{-7}$  |
| Age*BMI                                                                              |              | ns              |
| Young Nonobese                                                                       | Young Obese  | $6.25*10^{-3}$  |
| Young Nonobese                                                                       | Old Nonobese | ns              |
| Young Nonobese                                                                       | Old Obese    | $8.65*10^{-6}$  |
| Young Obese                                                                          | Old Nonobese | $1.88*10^{-2}$  |
| Young Obese                                                                          | Old Obese    | ns              |
| Old Nonobese                                                                         | Old Obese    | $6.36*10^{-6}$  |
| <i>Test: two-way ANOVA followed by Holm-Sidak post hoc correction</i>                |              |                 |
| <i>Sample size: Young Nonobese=12, Young Obese=15, Old Nonobese=36, Old Obese=32</i> |              |                 |
