# Supplementary material for: Targeting SIRT1 Rescues Age- and Obesity-Induced Microvascular Dysfunction in Ex Vivo Human Vessels
Source: PubMed Central journal article supplement — Circ Res. 2022 Aug 15;131(6):476–91. doi: 10.1161/CIRCRESAHA.122.320888 (PMC9426744; doi:10.1161/circresaha.122.320888), 2022-08-15
Supplement: res-131-476-s003.pdf [file res-131-476-s003.pdf]

## Major Resources Table

### Antibodies

| Target antigen                    | Vendor or Source         | Catalog # | Working concentration | Persistent ID / URL                                                                                                                                                               |
|-----------------------------------|--------------------------|-----------|-----------------------|-----------------------------------------------------------------------------------------------------------------------------------------------------------------------------------|
| SIRT1                             | Santa Cruz Biotechnology | sc-15404  | 1:1000                | <a href="https://www.scbt.com/p/sirt1-antibody-h-300">https://www.scbt.com/p/sirt1-antibody-h-300</a>                                                                             |
| $\beta$ -Actin                    | Sigma-Aldrich            | A2066     | 1:1000                | <a href="https://www.sigmaaldrich.com/IT/it/product/sigma/a2066">https://www.sigmaaldrich.com/IT/it/product/sigma/a2066</a>                                                       |
| Secondary anti-rabbit             | Sigma-Aldrich            | A0545     | 1:80,000              | <a href="https://www.sigmaaldrich.com/IT/it/product/sigma/a0545">https://www.sigmaaldrich.com/IT/it/product/sigma/a0545</a>                                                       |
| SIRT1                             | Millipore                | 07-131    | 1:1000                | <a href="https://www.merckmillipore.com/IT/it/product/Anti-Sirt1Sir2-Antibody,MM_NF-07-131">https://www.merckmillipore.com/IT/it/product/Anti-Sirt1Sir2-Antibody,MM_NF-07-131</a> |
| Mouse IgG (negative ChIP control) | Millipore                | 12-371    | 1:1000                | <a href="https://www.merckmillipore.com/IT/it/product/Normal-Mouse-IgG,MM_NF-12-371">https://www.merckmillipore.com/IT/it/product/Normal-Mouse-IgG,MM_NF-12-371</a>               |

### DNA/cDNA Clones

| Clone Name                          | Sequence                       | Predicted amplicon size (bp) |
|-------------------------------------|--------------------------------|------------------------------|
| Human-SIRT1-forward                 | TAG CCT TGT CAG ATA AGG AAG GA | 160                          |
| Human-SIRT1-reverse                 | ACA GCT TCA CAG TCA ACT TTG T  |                              |
| Human-p66 <sup>Shc</sup> -forward   | GCC AAA GAC CCT GTG AAT CAG    | 114                          |
| Human-p66 <sup>Shc</sup> -reverse   | GTA TTG TTT GAA GCG CAA CTC G  |                              |
| Human-FOXO3-forward                 | CGG ACA AAC GGC TCA CTC T      | 150                          |
| Human-FOXO3-reverse                 | GGA CCC GCA TGA ATC GAC TAT    |                              |
| Human-SOD2-forward                  | TTT CAA TAA GGA ACG GGG ACA C  | 109                          |
| Human-SOD2-reverse                  | GTG CTC CCA CAC ATC AAT CC     |                              |
| Human-ARGII-forward                 | GCA GCT TGT TGG TTG TCA CT     | 154                          |
| Human-ARGII-reverse                 | TTC CTG CTA AGT GGC TGT GT     |                              |
| Human-SIRT3-forward                 | GAA CAT GGC GTT CTG GGG TT     | 73                           |
| Human-SIRT3-reverse                 | CTC GAC CCG TTC AAC TAC CC     |                              |
| Human-CYTB-forward                  | CTC ATT CAT CGA CCT CCC CA     | 156                          |
| Human-CYTB-reverse                  | TGG GCG ATT GAT GAA AAG GC     |                              |
| Human-ATP6-forward                  | GGG CGC AGT GAT TAT AGG CT     | 83                           |
| Human-ATP6-reverse                  | TAA GGG GTG TAG GTG TGC CT     |                              |
| Human-ND2-forward                   | CCTACGCCTAATCTACTCCACC         | 122                          |
| Human-ND2-reverse                   | CGAGAAGGGAGATGAGTGTGG          |                              |
| Human-ND5-forward                   | GTG ATG CCC AGG GAA GAC AG     | 96                           |
| Human-ND5-reverse                   | CCC ACA ATT GAA ACA TTT CGG A  |                              |
| p66 <sup>Shc</sup> promoter-forward | CTT ACT GTA TGG GGT AGC GGT T  | 259                          |
| p66 <sup>Shc</sup> promoter-reverse | ACG GAA AGG AAG GAG ATA GGA G  |                              |
| ARGII promoter-forward              | CTG CGA AGA AGG TGT GCC        | 217                          |
| ARGII promoter-reverse              | TGG AGG AGA CGC GAG AGG        |                              |
| SIRT3 promoter-forward              | TTG TGG TGT CAG CCT TTG TG     | 176                          |
| SIRT3 promoter-reverse              | CAT TTC TGT ACC CTG CGC TC     |                              |

### Other

| Description                       | Source / Repository       | Persistent ID / URL                                                                                         |
|-----------------------------------|---------------------------|-------------------------------------------------------------------------------------------------------------|
| Pressure Myograph System DMT 114P | Danish Myo Technology A/S | <a href="https://www.dmt.dk/pressure-myograph-114p.html">https://www.dmt.dk/pressure-myograph-114p.html</a> |

DOI [to be added]

|                                                                          |                          |                                                                                                                                                                                                                                                                                                                                       |
|--------------------------------------------------------------------------|--------------------------|---------------------------------------------------------------------------------------------------------------------------------------------------------------------------------------------------------------------------------------------------------------------------------------------------------------------------------------|
| Norepinephrine                                                           | Sigma Aldrich SRL        | <a href="https://www.sigmaaldrich.com/IT/it/product/sigma/a7257">https://www.sigmaaldrich.com/IT/it/product/sigma/a7257</a>                                                                                                                                                                                                           |
| Acetylcholine                                                            | Sigma Aldrich SRL        | <a href="https://www.sigmaaldrich.com/IT/it/product/sigma/a6625">https://www.sigmaaldrich.com/IT/it/product/sigma/a6625</a>                                                                                                                                                                                                           |
| Sodium nitroprusside                                                     | Sigma Aldrich SRL        | <a href="https://www.sigmaaldrich.com/IT/it/product/sigald/71778L">https://www.sigmaaldrich.com/IT/it/product/sigald/71778L</a>                                                                                                                                                                                                       |
| L-NAME                                                                   | Sigma Aldrich SRL        | <a href="https://www.sigmaaldrich.com/IT/it/product/sigma/n5751">https://www.sigmaaldrich.com/IT/it/product/sigma/n5751</a>                                                                                                                                                                                                           |
| SRT1720                                                                  | Sigma Aldrich SRL        | <a href="https://www.sigmaaldrich.com/IT/it/product/mm/567860">https://www.sigmaaldrich.com/IT/it/product/mm/567860</a>                                                                                                                                                                                                               |
| sc-40986                                                                 | Santa Cruz Biotechnology | <a href="https://www.scbt.com/it/p/sirt1-sirna-h-shrna-and-lentiviral-particle-gene-silencers">https://www.scbt.com/it/p/sirt1-sirna-h-shrna-and-lentiviral-particle-gene-silencers</a>                                                                                                                                               |
| mitoTEMPO                                                                | Sigma Aldrich SRL        | <a href="https://www.sigmaaldrich.com/IT/it/product/sigma/sml0737">https://www.sigmaaldrich.com/IT/it/product/sigma/sml0737</a>                                                                                                                                                                                                       |
| tempol                                                                   | Sigma Aldrich SRL        | <a href="https://www.sigmaaldrich.com/IT/it/product/aldrich/176141">https://www.sigmaaldrich.com/IT/it/product/aldrich/176141</a>                                                                                                                                                                                                     |
| rotenone                                                                 | Sigma Aldrich SRL        | <a href="https://www.sigmaaldrich.com/IT/it/product/sigma/r8875">https://www.sigmaaldrich.com/IT/it/product/sigma/r8875</a>                                                                                                                                                                                                           |
| Gp91dstat                                                                | Sigma Aldrich SRL        | <a href="https://www.sigmaaldrich.com/IT/it/product/sigma/sml2967">https://www.sigmaaldrich.com/IT/it/product/sigma/sml2967</a>                                                                                                                                                                                                       |
| Lipofectamine RNAiMAX                                                    | Invitrogen, ThermoFisher | <a href="https://www.thermofisher.com/it/en/home/brands/product-brand/lipofectamine/lipofectamine-rnaimx.html#acet">https://www.thermofisher.com/it/en/home/brands/product-brand/lipofectamine/lipofectamine-rnaimx.html#acet</a>                                                                                                     |
| TRizol Reagent                                                           | Invitrogen, ThermoFisher | <a href="https://www.thermofisher.com/order/catalog/product/15596026">https://www.thermofisher.com/order/catalog/product/15596026</a>                                                                                                                                                                                                 |
| Moloney murine leukaemia virus reverse transcriptase and random hexamers | Amersham Bioscience      | <a href="https://www.cytivalifesciences.com/en/it/shop/molecular-biology/pcr-and-amplification/kits-and-ready-to-go-beads/illustra-ready-to-go-rt-pcr-beads-p-06202">https://www.cytivalifesciences.com/en/it/shop/molecular-biology/pcr-and-amplification/kits-and-ready-to-go-beads/illustra-ready-to-go-rt-pcr-beads-p-06202</a>   |
| SYBR Select Master Mix                                                   | Thermo Fischer           | <a href="https://www.thermofisher.com/it/en/home/life-science/pcr/real-time-pcr/real-time-pcr-reagents/sybr-green-real-time-master-mixes/sybr-select-master-mix.html">https://www.thermofisher.com/it/en/home/life-science/pcr/real-time-pcr/real-time-pcr-reagents/sybr-green-real-time-master-mixes/sybr-select-master-mix.html</a> |
| Quant Studio 5                                                           | Thermo Fischer           | <a href="https://www.thermofisher.com/order/catalog/product/A28139?SID=srch-srp-A28139">https://www.thermofisher.com/order/catalog/product/A28139?SID=srch-srp-A28139</a>                                                                                                                                                             |
| Quant Studio 7                                                           | Thermo Fischer           | <a href="https://www.thermofisher.com/order/catalog/product/A43162?SID=srch-srp-A43162">https://www.thermofisher.com/order/catalog/product/A43162?SID=srch-srp-A43162</a>                                                                                                                                                             |
| MitoSOX Red                                                              | Thermo Fischer           | <a href="https://www.thermofisher.com/order/catalog/product/M36008">https://www.thermofisher.com/order/catalog/product/M36008</a>                                                                                                                                                                                                     |
| DAF-FM                                                                   | Thermo Fischer           | <a href="https://www.sigmaaldrich.com/IT/it/product/sigma/d2321">https://www.sigmaaldrich.com/IT/it/product/sigma/d2321</a>                                                                                                                                                                                                           |
| ENZ-51013 ROS-ID® NO Detection kit                                       | Enzo Life Sciences Inc   | <a href="https://www.enzolifesciences.com/ENZ-51013/ros-id-no-detection-kit/">https://www.enzolifesciences.com/ENZ-51013/ros-id-no-detection-kit/</a>                                                                                                                                                                                 |
| MITOPY1                                                                  | Bio-Techne srl           | <a href="https://www.tocris.com/products/mitopy1_4428">https://www.tocris.com/products/mitopy1_4428</a>                                                                                                                                                                                                                               |
| RIPA buffer, R0278                                                       | Sigma-Aldrich            | <a href="https://www.sigmaaldrich.com/IT/it/product/sigma/r0278">https://www.sigmaaldrich.com/IT/it/product/sigma/r0278</a>                                                                                                                                                                                                           |
| Amersham Protan Nitrocellulose 0.45 µm                                   | GE-Healthcare            | <a href="https://www.sigmaaldrich.com/IT/it/product/sigma/ge10600002">https://www.sigmaaldrich.com/IT/it/product/sigma/ge10600002</a>                                                                                                                                                                                                 |
| Clarify MAX Western ECL Substrate                                        | Bio-Rad Laboratories     | <a href="https://www.bio-rad.com/it-it/sku/1705062-clarify-max-western-ecl-substrate-100-ml?ID=1705062">https://www.bio-rad.com/it-it/sku/1705062-clarify-max-western-ecl-substrate-100-ml?ID=1705062</a>                                                                                                                             |
| ChemiDoc Imaging System                                                  | Bio-Rad Laboratories     | <a href="https://www.bio-rad.com/it-it/product/chemidoc-mp-imaging-system?ID=NINJ8ZE8Z">https://www.bio-rad.com/it-it/product/chemidoc-mp-imaging-system?ID=NINJ8ZE8Z</a>                                                                                                                                                             |
| Magna ChIP Assay Kit                                                     | Millipore                | <a href="https://www.sigmaaldrich.com/IT/it/product/mm/17610">https://www.sigmaaldrich.com/IT/it/product/mm/17610</a>                                                                                                                                                                                                                 |

## Software

| Description                          | Source / Repository           | Persistent ID / URL                                                                                                                     |
|--------------------------------------|-------------------------------|-----------------------------------------------------------------------------------------------------------------------------------------|
| SPSS version 20.0                    | IBM                           | <a href="https://www.ibm.com/it-it/analytics/spss-statistics-software">https://www.ibm.com/it-it/analytics/spss-statistics-software</a> |
| GraphPad Prism 7.04                  | GraphPad                      | <a href="https://www.graphpad.com/scientific-software/prism/">https://www.graphpad.com/scientific-software/prism/</a>                   |
| Jamovi version 2.3                   | The Jamovi Project            | <a href="https://www.jamovi.org/">https://www.jamovi.org/</a>                                                                           |
| McBiophotonics Image J, version 1.53 | National Institutes of Health | <a href="https://imagej.nih.gov/ij/download.html">https://imagej.nih.gov/ij/download.html</a>                                           |
