# Supplementary figures and images for: Targeting SIRT1 Rescues Age- and Obesity-Induced Microvascular Dysfunction in Ex Vivo Human Vessels
Source: PubMed Central journal article supplement — Circ Res. 2022 Aug 15;131(6):476–91. doi: 10.1161/CIRCRESAHA.122.320888 (PMC9426744; doi:10.1161/circresaha.122.320888), 2022-08-15

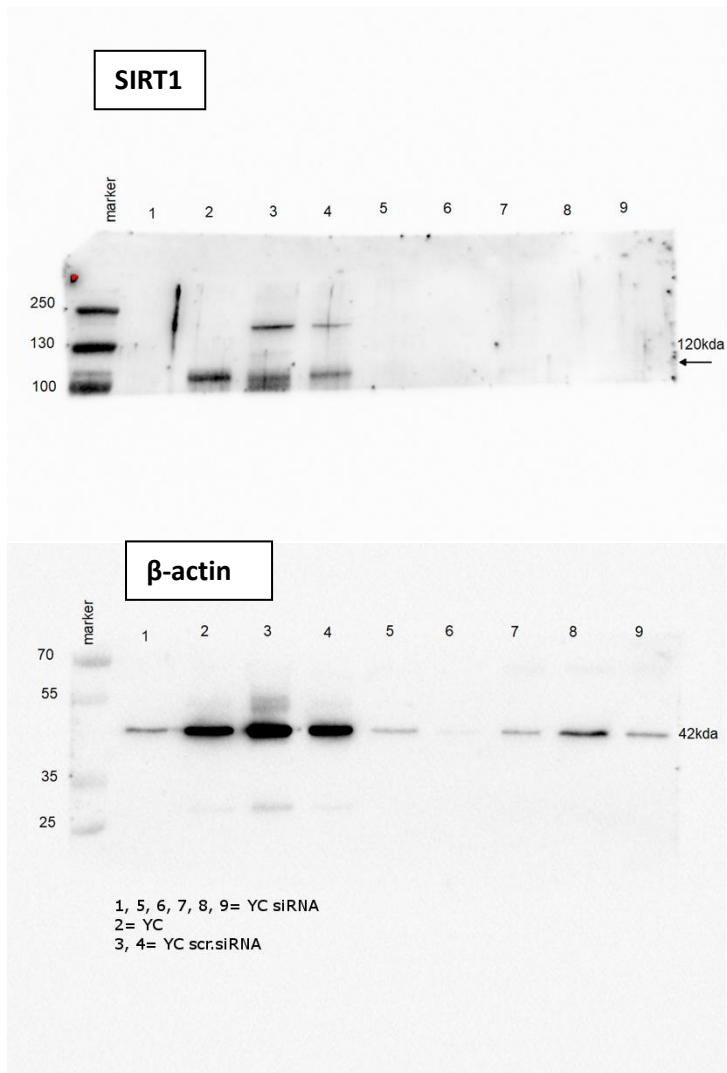

Full unedited gel for Supplementary Figure 2.

Supplement: res-131-476-s002.pdf [file res-131-476-s002.pdf]
